# Supplementary material
Source: Research Square preprint supplement (doi:10.21203/rs.3.rs-7530828/v1)
Supplement: Supplementary file 1 [file c117e53c412788e2aa29c0da.pdf]

## Supplementary Information (SI)

### Hidden Spin-Valley-Locking Extends Room Temperature Spin Lifetime in 2D Perovskite

#### Semiconductors

Rayan Chakraborty,<sup>1,#</sup> Yifan Dong,<sup>2,3,#</sup> Jacob L. Shelton,<sup>2</sup> Kelsey Garden,<sup>2</sup> Leo Romanetz,<sup>4</sup>  
Matthew P. Hautzinger,<sup>2</sup> Matthew C. Beard,<sup>2,\*</sup> Volker Blum,<sup>1,5</sup> David B. Mitzi<sup>1,5,\*</sup>

<sup>1</sup>Thomas Lord Department of Mechanical Engineering and Materials Science, Duke University, Durham, North Carolina 27708, United States

<sup>2</sup>National Laboratory of the Rockies, Golden, Colorado 80401, United States

<sup>3</sup>Department of Chemistry, University of California, Riverside, Riverside, California 92507, United States

<sup>4</sup>Department of Chemistry, University of Colorado, Boulder, Colorado 80309, United States

<sup>5</sup>Department of Chemistry, Duke University. Durham, North Carolina 27708, United States

#Authors contributed equally

## A. Supplementary Tables.

**Table S1.** Crystal structure refinement parameters for (AzF<sub>2</sub>)<sub>2</sub>PbI<sub>4</sub>.

|                                                       |                                                                               |
|-------------------------------------------------------|-------------------------------------------------------------------------------|
| Temperature (K)                                       | 298                                                                           |
| Space group                                           | <i>Pc</i>                                                                     |
| <i>a</i> (Å)                                          | 25.6055(5)                                                                    |
| <i>b</i> (Å)                                          | 8.8128(10)                                                                    |
| <i>c</i> (Å)                                          | 25.9344(4)                                                                    |
| $\alpha$ (°)                                          | 90                                                                            |
| $\beta$ (°)                                           | 110.232(2)                                                                    |
| $\gamma$ (°)                                          | 90                                                                            |
| Density (g/cm <sup>3</sup> )                          | 3.277                                                                         |
| $\mu$ (mm <sup>-1</sup> )                             | 15.984                                                                        |
| F(000)                                                | 4704                                                                          |
| 2 $\Theta$ range for data collection (°)              | 3.186 to 61.536                                                               |
| Index ranges                                          | -36 ≤ <i>h</i> ≤ 35, -12 ≤ <i>k</i> ≤ 11, -35 ≤ <i>l</i> ≤ 31                 |
| Reflections collected                                 | 120068                                                                        |
| Independent reflections                               | 27188 [ <i>R</i> <sub>int</sub> = 0.0370, <i>R</i> <sub>sigma</sub> = 0.0341] |
| Data/ restraints/ parameters                          | 27188/9/19                                                                    |
| Goodness-of-fit on F <sup>2</sup>                     | 1.024                                                                         |
| Final R indexes [ <i>I</i> ≥ 2 $\sigma$ ( <i>I</i> )] | <i>R</i> <sub>1</sub> = 0.0362, <i>wR</i> <sub>2</sub> = 0.0771               |
| Final R indexes [all data]                            | <i>R</i> <sub>1</sub> = 0.0499, <i>wR</i> <sub>2</sub> = 0.0808               |
| Largest diff. peak/hole (e Å <sup>-3</sup> )          | 1.85/-0.930                                                                   |
| Flack parameter                                       | 0.005(4)                                                                      |

**Table S2.** Pb – I octahedra distances in  $(\text{AzF}_2)_2\text{PbI}_4$  at room temperature. Atomic positions corresponding to the atom indices are provided in section D.5.

| Label of Pb atoms | Label of I atoms | Distance (Angstrom) |
|-------------------|------------------|---------------------|
| Pb1               | I9               | 3.2047              |
| Pb1               | I13              | 3.1963              |
| Pb1               | I15              | 3.1756              |
| Pb1               | I19              | 3.1506              |
| Pb1               | I21              | 3.2063              |
| Pb1               | I29              | 3.2613              |
| Pb3               | I9               | 3.2099              |
| Pb3               | I11              | 3.2079              |
| Pb3               | I21              | 3.203               |
| Pb3               | I23              | 3.1615              |
| Pb3               | I25              | 3.198               |
| Pb5               | I7               | 3.2062              |
| Pb5               | I12              | 3.2312              |
| Pb5               | I13              | 3.1643              |
| Pb5               | I15              | 3.182               |
| Pb5               | I17              | 3.2057              |
| Pb5               | I27              | 3.2303              |
| Pb31              | I37              | 3.2032              |
| Pb31              | I43              | 3.2121              |
| Pb31              | I47              | 3.2052              |
| Pb31              | I51              | 3.2018              |
| Pb31              | I53              | 3.1428              |
| Pb31              | I55              | 3.2357              |
| Pb33              | I39              | 3.2329              |
| Pb33              | I41              | 3.1622              |
| Pb33              | I43              | 3.2181              |
| Pb33              | I49              | 3.1733              |
| Pb33              | I51              | 3.2428              |
| Pb33              | I59              | 3.181               |
| Pb35              | I38              | 3.2198              |
| Pb35              | I41              | 3.1867              |
| Pb35              | I45              | 3.1962              |
| Pb35              | I48              | 3.2195              |
| Pb35              | I49              | 3.1553              |
| Pb35              | I57              | 3.2308              |

**Table S3.** Pb – I – Pb bond angles in (AzF<sub>2</sub>)<sub>2</sub>PbI<sub>4</sub> at 298 K. Atomic positions corresponding to the atomic indices are provided in section D.5.

| <b>Pb – I – Pb angle (°)</b> | <b>Atom indices</b> |
|------------------------------|---------------------|
| 148.605                      | (1, 9, 3)           |
| 142.804                      | (1, 13, 5)          |
| 159.173                      | (4, 12, 5)          |
| 148.407                      | (33, 43, 31)        |
| 159.734                      | (36, 47, 31)        |
| 147.293                      | (3, 18, 6)          |
| 159.772                      | (3, 21, 1)          |
| 144.598                      | (5, 15, 1)          |
| 148.561                      | (31, 37, 36)        |
| 159.069                      | (31, 51, 33)        |
| 143.149                      | (33, 49, 35)        |
| 142.799                      | (35, 41, 33)        |

**Table S4.** Crystal structure refinement parameters for (AzOH)<sub>2</sub>PbI<sub>4</sub>.

|                                              |                                                               |                                                               |
|----------------------------------------------|---------------------------------------------------------------|---------------------------------------------------------------|
| Temperature (K)                              | 298                                                           | 100                                                           |
| Space group                                  | <i>P2<sub>1</sub>/m</i>                                       | <i>P2<sub>1</sub>/m</i>                                       |
| <i>a</i> (Å)                                 | 6.41330(10)                                                   | 6.3733(2)                                                     |
| <i>b</i> (Å)                                 | 20.5227(5)                                                    | 20.3267(5)                                                    |
| <i>c</i> (Å)                                 | 6.47590(10)                                                   | 6.4050(2)                                                     |
| $\alpha$ (°)                                 | 90                                                            | 90                                                            |
| $\beta$ (°)                                  | 90.096(2)                                                     | 90.112(2)                                                     |
| $\gamma$ (°)                                 | 90                                                            | 90                                                            |
| Density (g/cm <sup>3</sup> )                 | 3.363                                                         | 3.454                                                         |
| $\mu$ (mm <sup>-1</sup> )                    | 17.130                                                        | 17.596                                                        |
| F(000)                                       | 752.0                                                         | 752.0                                                         |
| 2 $\Theta$ range for data collection (°)     | 3.97 to 61.784                                                | 4.008 to 62.266                                               |
| Index ranges                                 | -9 ≤ <i>h</i> ≤ 7, -26 ≤ <i>k</i> ≤ 27, -9 ≤ <i>l</i> ≤ 8     | -8 ≤ <i>h</i> ≤ 9, -28 ≤ <i>k</i> ≤ 27, -9 ≤ <i>l</i> ≤ 8     |
| Reflections collected                        | 19326                                                         | 12454                                                         |
| Independent reflections                      | 2391 [R <sub>int</sub> = 0.0327, R <sub>sigma</sub> = 0.0198] | 2306 [R <sub>int</sub> = 0.0338, R <sub>sigma</sub> = 0.0237] |
| Data/ restraints/ parameters                 | 2391/0/105                                                    | 2306/0/105                                                    |
| Goodness-of-fit on F <sup>2</sup>            | 1.027                                                         | 1.039                                                         |
| Final R indexes [I ≥ 2σ (I)]                 | R <sub>1</sub> = 0.0185, wR <sub>2</sub> = 0.0353             | R <sub>1</sub> = 0.0168, wR <sub>2</sub> = 0.0333             |
| Final R indexes [all data]                   | R <sub>1</sub> = 0.0232, wR <sub>2</sub> = 0.0364             | R <sub>1</sub> = 0.0184, wR <sub>2</sub> = 0.0337             |
| Largest diff. peak/hole (e Å <sup>-3</sup> ) | 0.71/-0.93                                                    | 0.77/-1.05                                                    |

**Table S5.** Comparison of non-covalent interactions in  $A_2PbI_4$  ( $A = EOA, AzOH, AzF_2$ ) structures at room temperature. For  $A=EOA$  and  $AzOH$ , the I labels correspond to the three closest iodine atoms to the ammonium nitrogen; For  $A=AzF_2$ , atomic positions corresponding to the iodine indices are provided in section D.5.

| Structure        | N-H...X Interaction | I labels | $d_{H-X}$ Distance (Å) | N-H...X Angle (degree) |
|------------------|---------------------|----------|------------------------|------------------------|
| $(EOA)_2PbI_4$   | N-H...I             | I1       | 2.86                   | 139.55                 |
|                  |                     | I2       | 2.92                   | 178.09                 |
|                  |                     | I3       | 3.13                   | 123.59                 |
|                  | N-H...O             | --       | 2.23                   | 138.93                 |
| $(AzOH)_2PbI_4$  | N-H...I             | I1       | 3.16                   | 127.45                 |
|                  |                     | I2       | 3.21                   | 141.23                 |
|                  |                     | I3       | 3.23                   | 110.98                 |
|                  | N-H...O             | --       | 2.12                   | 147.37                 |
| $(AzF_2)_2PbI_4$ | N-H...I             | I1       | 2.85                   | 142.62                 |
|                  |                     | I2       | 3.14                   | 135.65                 |
|                  |                     | I3       | 3.17                   | 110.08                 |
|                  |                     | I4       | 2.95                   | 142.64                 |
|                  |                     | I5       | 2.96                   | 136.11                 |
|                  |                     | I6       | 3.08                   | 125.42                 |
|                  |                     | I7       | 3.11                   | 133.35                 |
|                  |                     | I8       | 2.82                   | 154.55                 |
|                  |                     | I9       | 3.96                   | 141.00                 |
|                  |                     | I10      | 3.08                   | 124.99                 |
|                  |                     | I11      | 2.73                   | 154.71                 |
|                  |                     | I12      | 2.77                   | 148.87                 |

**Table S6.** Crystal structure refinement parameters for (AzOH)<sub>2</sub>SnI<sub>4</sub>.

|                                              |                                                                              |                                                                              |
|----------------------------------------------|------------------------------------------------------------------------------|------------------------------------------------------------------------------|
| Temperature (K)                              | 298                                                                          | 100                                                                          |
| Space group                                  | <i>P2<sub>1</sub>/m</i>                                                      | <i>P2<sub>1</sub>/m</i>                                                      |
| <i>a</i> (Å)                                 | 6.3796(2)                                                                    | 6.33480(10)                                                                  |
| <i>b</i> (Å)                                 | 20.4457(5)                                                                   | 20.2446(5)                                                                   |
| <i>c</i> (Å)                                 | 6.47180(10)                                                                  | 6.40680(10)                                                                  |
| $\alpha$ (°)                                 | 90                                                                           | 90                                                                           |
| $\beta$ (°)                                  | 90.576(2)                                                                    | 90.622(2)                                                                    |
| $\gamma$ (°)                                 | 90                                                                           | 90                                                                           |
| Density (g/cm <sup>3</sup> )                 | 3.047                                                                        | 3.131                                                                        |
| $\mu$ (mm <sup>-1</sup> )                    | 8.817                                                                        | 9.059                                                                        |
| F(000)                                       | 688.0                                                                        | 688.0                                                                        |
| 2 $\Theta$ range for data collection (°)     | 3.984 to 61.908                                                              | 4.024 to 61.824                                                              |
| Index ranges                                 | -7 ≤ <i>h</i> ≤ 9, -28 ≤ <i>k</i> ≤ 25, -8 ≤ <i>l</i> ≤ 8                    | -8 ≤ <i>h</i> ≤ 8, -28 ≤ <i>k</i> ≤ 26, -8 ≤ <i>l</i> ≤ 8                    |
| Reflections collected                        | 18951                                                                        | 18600                                                                        |
| Independent reflections                      | 2422 [ <i>R</i> <sub>int</sub> = 0.0345, <i>R</i> <sub>sigma</sub> = 0.0180] | 2317 [ <i>R</i> <sub>int</sub> = 0.0361, <i>R</i> <sub>sigma</sub> = 0.0191] |
| Data/ restraints/ parameters                 | 2422/0/105                                                                   | 2317/0/105                                                                   |
| Goodness-of-fit on F <sup>2</sup>            | 1.042                                                                        | 1.087                                                                        |
| Final R indexes [ <i>I</i> ≥ 2σ( <i>I</i> )] | <i>R</i> <sub>1</sub> = 0.0219, <i>wR</i> <sub>2</sub> = 0.0479              | <i>R</i> <sub>1</sub> = 0.0187, <i>wR</i> <sub>2</sub> = 0.0417              |
| Final R indexes [all data]                   | <i>R</i> <sub>1</sub> = 0.0268, <i>wR</i> <sub>2</sub> = 0.0496              | <i>R</i> <sub>1</sub> = 0.0209, <i>wR</i> <sub>2</sub> = 0.0424              |
| Largest diff. peak/hole (e Å <sup>-3</sup> ) | 0.82/-0.66                                                                   | 1.03/-0.73                                                                   |

**Table S7.** Spin lifetime in bulk semiconductors at or near room temperature.

| Semiconductor        | $\tau_s$ | Temperature (K) | Measurement method                                                         | Reference |
|----------------------|----------|-----------------|----------------------------------------------------------------------------|-----------|
| GaAs                 | 100 ps   | 300             | Pump-probe optical spectroscopy                                            | 1         |
| GaNAs                | 196 ps   | 300             | Hanle fitting of PL with $B_{\text{ext}} = 0.06$ T                         | 2         |
| Cubic GaN            | 530 ps   | 300             | Time resolved Kerr rotation at $B_{\text{ext}} = 0.11$ T                   | 3         |
| InSb (grown on GaAs) | 2.5 ps   | 290             | Circularly polarized pump-probe                                            | 4         |
| CsPbBr <sub>3</sub>  | 10 ps    | 300             | Circularly-polarized photoinduced reflectivity at $B_{\text{ext}} = 0.7$ T | 5         |
|                      | 3.7 ps   | 295             | Circularly polarized pump-probe                                            | 6         |
| CsPbI <sub>3</sub>   | 1.3 ps   |                 |                                                                            |           |
| MAPbBr <sub>3</sub>  | 4.3 ps   |                 |                                                                            |           |
| MAPbI <sub>3</sub>   | 2.2 ps   |                 |                                                                            |           |

## B. Supplementary Figures.

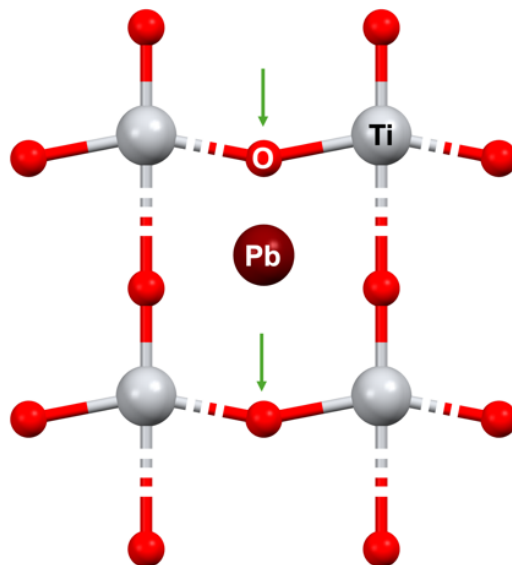

**Figure S1.** Polar distortions (green arrows show displacement of the  $\text{Ti-O-Ti}$  bond angle) in the tetragonal phase of  $\text{PbTiO}_3$  ( $010$  plane); the crystal structure is obtained from reference.<sup>7</sup>

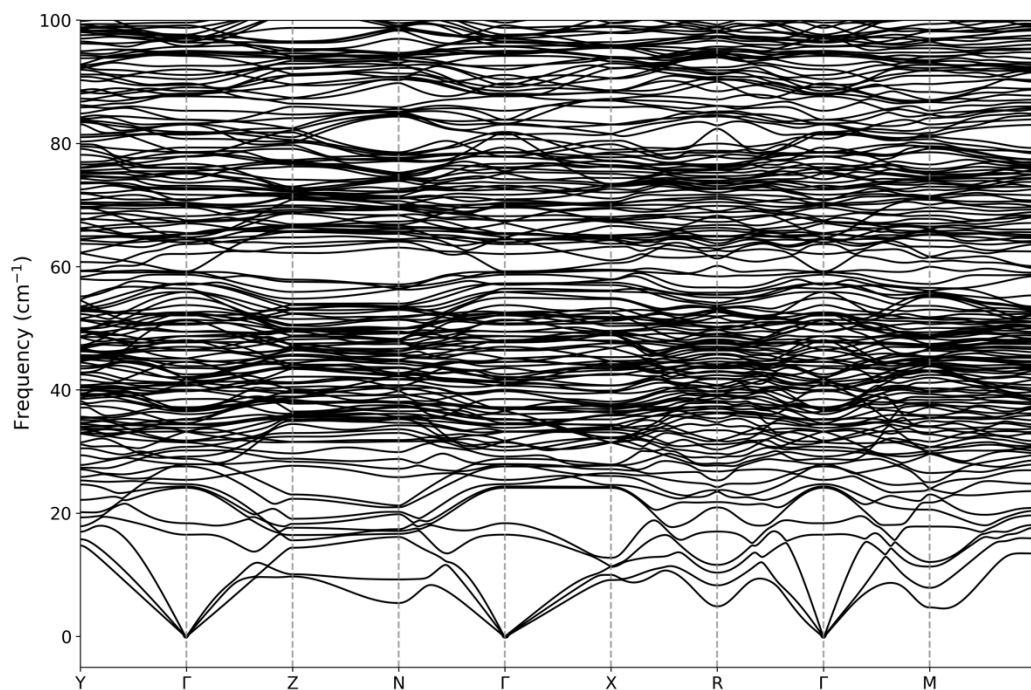

**Figure S2.** Simulated phonon band structure of  $(\text{AzOH})_2\text{PbI}_4$ .

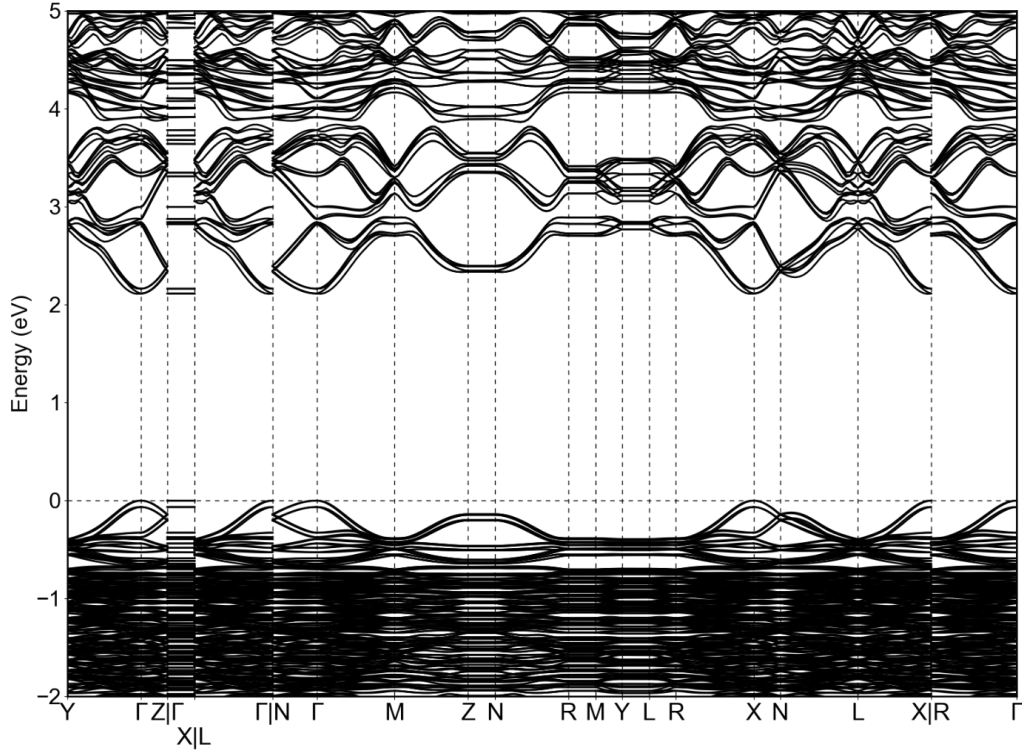

**Figure S3.** DFT-based HSE06 + SOC electronic band structure of  $(\text{AzF}_2)_2\text{PbI}_4$ .

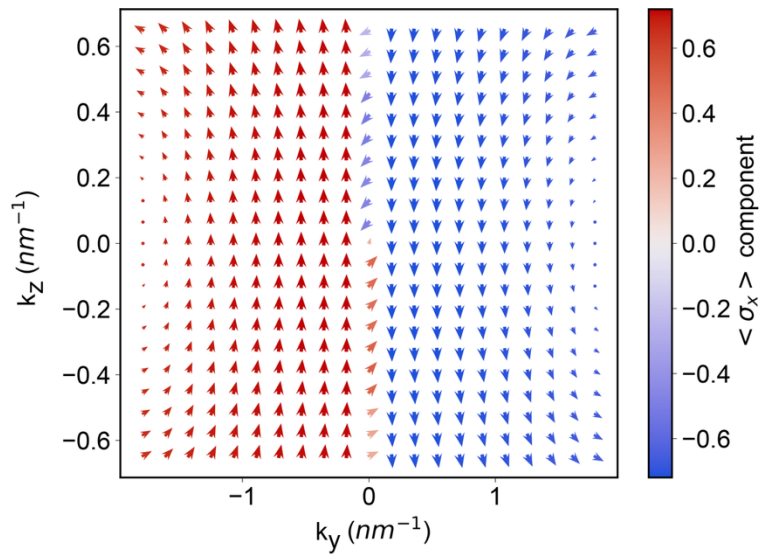

**Figure S4.** Two-dimensional spin texture plot of  $(\text{AzF}_2)_2\text{PbI}_4$  for the conduction band minima on the  $k_y$ - $k_z$  plane (parallel to the Pb – I layer), simulated with DFT (PBE + SOC).

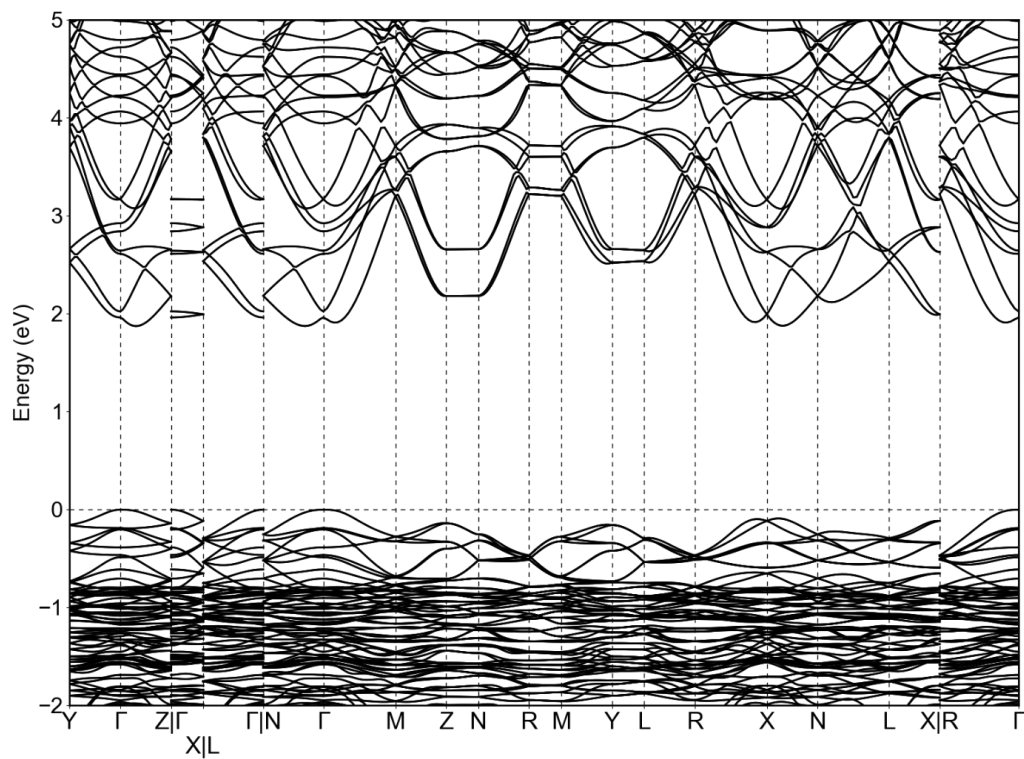

**Figure S5.** DFT-based HSE06 + SOC electronic band structure of  $(\text{AzOH})_2\text{PbI}_4$ .

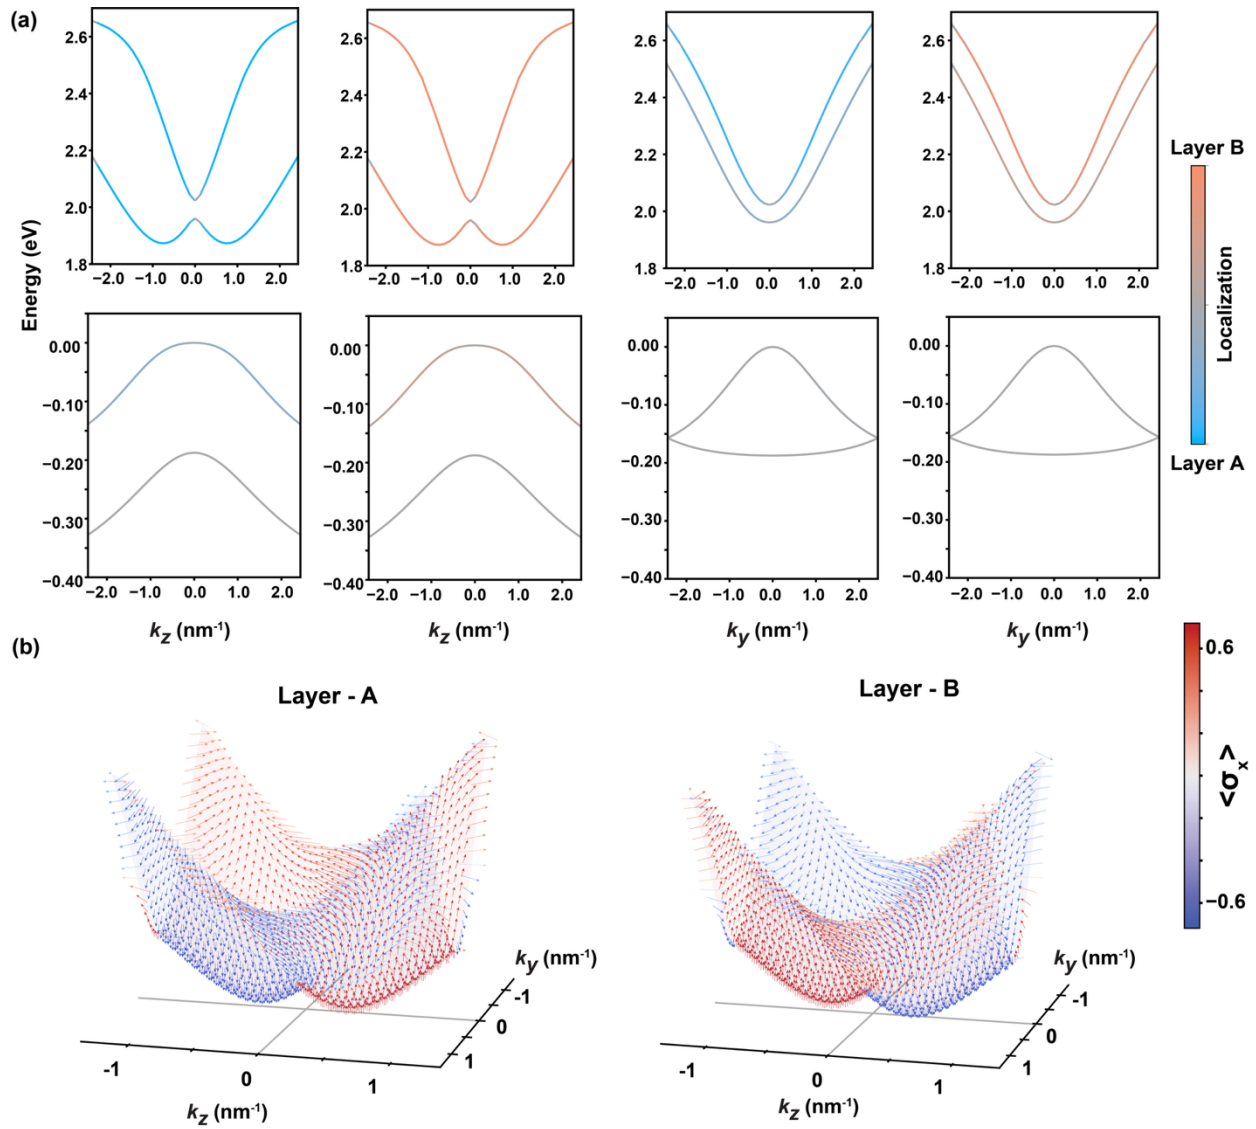

**Figure S6.** (a) Localization of the DFT (HSE06 + SOC)-derived electronic bands on two Pb – I layers and at the conduction (top panels) and valence (bottom panels) band edges in  $(\text{AzOH})_2\text{PbI}_4$ , calculated using Mulliken analysis, following the method described in reference<sup>8</sup>; (b) spin textures of the spin valleys at the conduction band minima on the  $k_y - k_z$  plane in  $(\text{AzOH})_2\text{PbI}_4$ , calculated using DFT (PBE + SOC); the left panel is reproduced in Figure 3c in the main text.

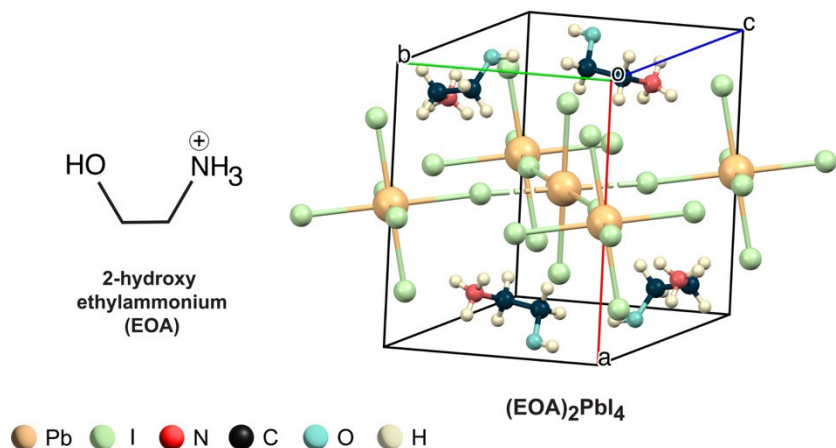

**Figure S7.** Schematic of the molecular structure of EOA (left) and the crystal structure of  $(\text{EOA})_2\text{PbI}_4$  (right) at room temperature. The crystal structure is obtained from reference<sup>9</sup>.

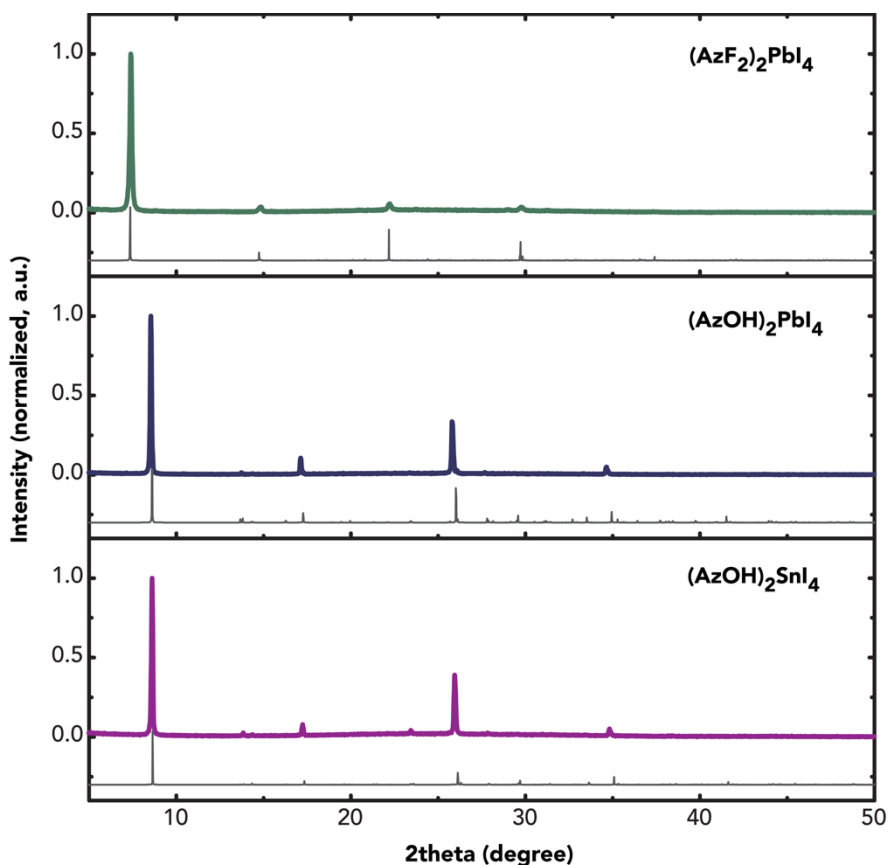

**Figure S8.** Powder X-ray diffraction (PXRD) profiles of 2D perovskite films with the azetidinium-based cations; the colored lines represent the experimental measurements at room temperature, while the grey lines are simulated from the corresponding room temperature single-crystal X-ray diffraction-derived structure with 50% orientational preference for the crystallographic directions ( $100$  for  $(\text{AzF}_2)_2\text{PbI}_4$  or  $010$  for  $(\text{AzOH})_2\text{PbI}_4$  and  $(\text{AzOH})_2\text{SnI}_4$ ) perpendicular to the 2D Pb-I layers.

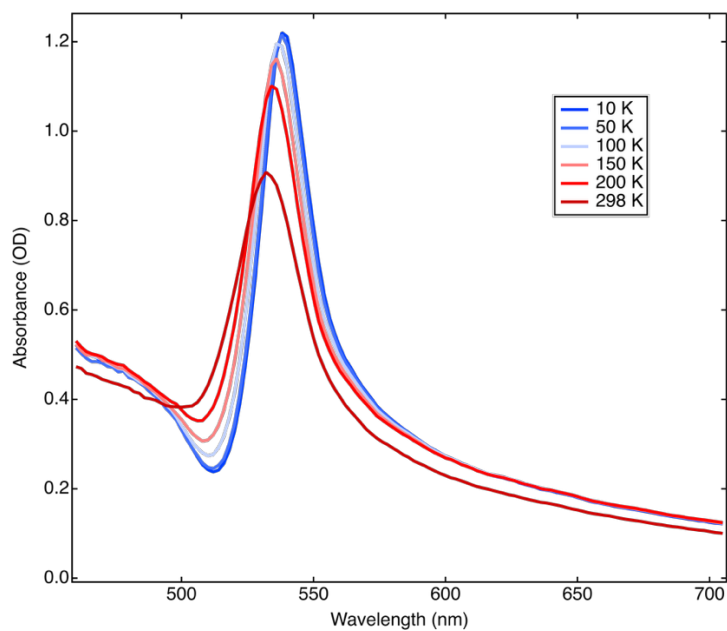

**Figure S9.** Temperature-dependent UV-vis spectra for  $(\text{AzOH})_2\text{PbI}_4$  thin films.

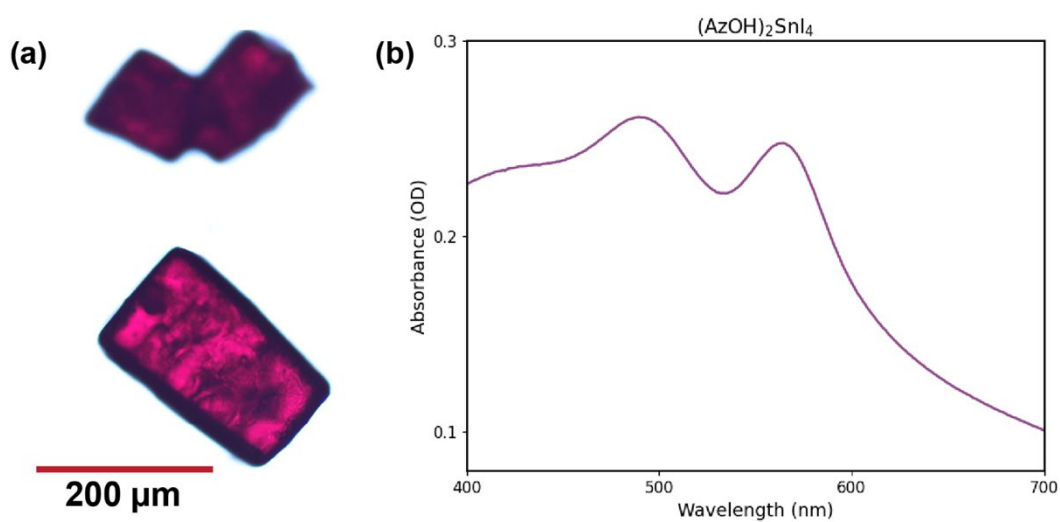

**Figure S10.** (a) Photograph of  $(\text{AzOH})_2\text{SnI}_4$  crystals and (b) UV-vis absorption spectrum of  $(\text{AzOH})_2\text{SnI}_4$  thin film at room temperature.

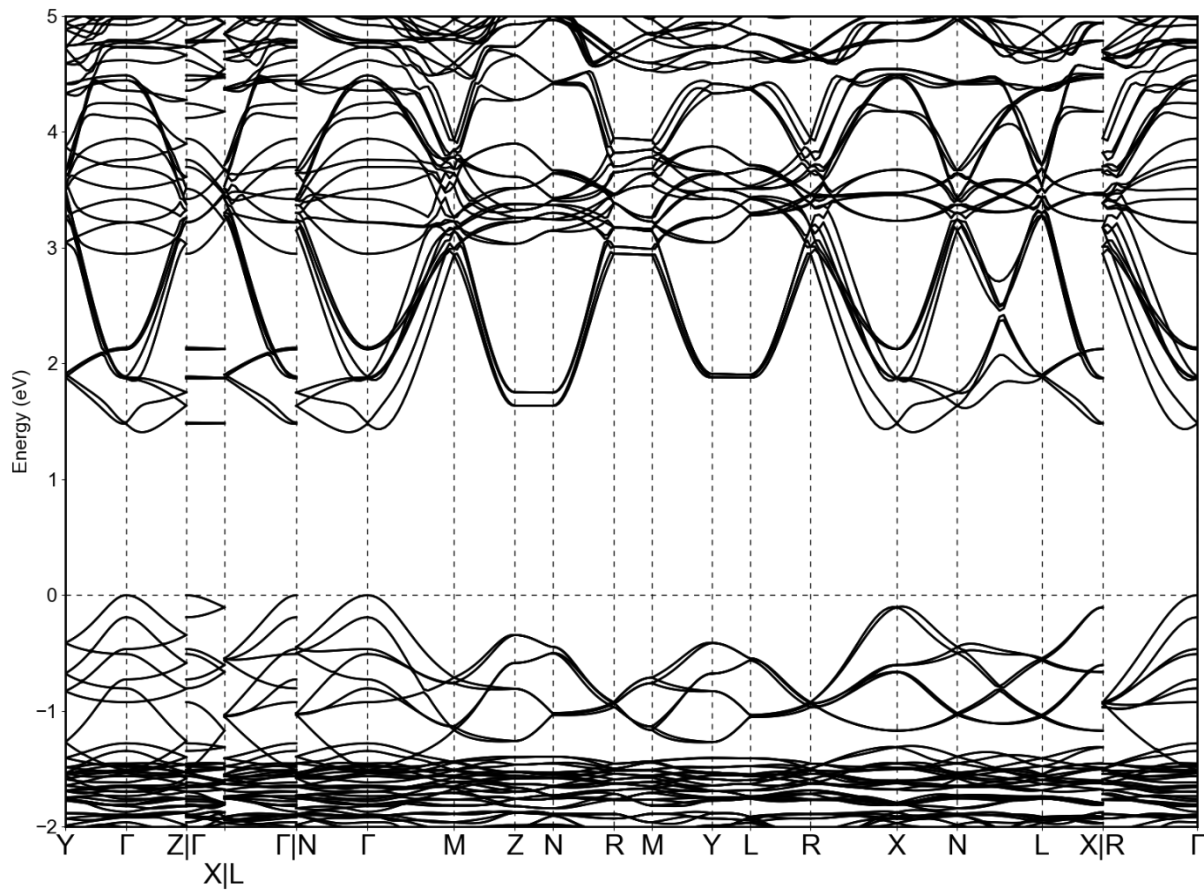

**Figure S11.** DFT-based HSE06 + SOC electronic band structure of  $(\text{AzOH})_2\text{SnI}_4$ .

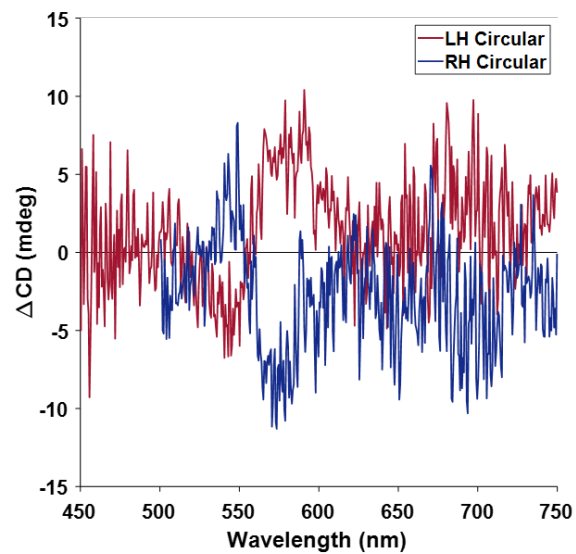

**Figure S12.** Comparison of TRCD response of  $(\text{AzOH})_2\text{SnI}_4$  film at 290 K on left and right circularly polarized excitation (400 nm) and different probe wavelengths.

### C. Supplementary Note. Origin of Symmetry Transfer in (AzOH)<sub>2</sub>PbI<sub>4</sub>.

(AzOH)<sub>2</sub>PbI<sub>4</sub>, and (EOA)<sub>2</sub>PbI<sub>4</sub> crystallize in the centrosymmetric  $P2_1/m$  and  $P2_1/a$  space groups, respectively. While the octahedra, Pb–I layer, and unit cell individually exhibit inversion symmetry in (EOA)<sub>2</sub>PbI<sub>4</sub>, the former two structural units lose their inversion centers in (AzOH)<sub>2</sub>PbI<sub>4</sub>, leading to the observed hidden spin polarization in the DFT simulations. The contrast in the symmetry of the Pb–I layers originates from the differences in the N–H⋯I and N–H⋯O interactions between the organic and inorganic sublattices (dashed lines in Extended Data Figure 3a-b; Table S5 provides the corresponding distances). The intermolecular interactions provide rigidity and restrict the A-cation motion within the assessed range of 100 - 298 K,<sup>9,10</sup> inducing phase stability for (AzOH)<sub>2</sub>PbI<sub>4</sub> in the same temperature window (Table S4 shows slight deviations in the lattice parameters). A crucial difference between EOA and AzOH is the number of hydrogen atoms in the ammonium group—i.e., *three* different N–H⋯I interactions of similar strengths (based on H–I distances and N–H⋯I angles) in (EOA)<sub>2</sub>PbI<sub>4</sub> for each A-cation. In contrast, the secondary ammonium group in AzOH includes only *two* hydrogen atoms, reducing the number of possible N–H⋯I interactions in the structure to two (Extended Data Figure 3b). The AzOH cation also introduces symmetry-breaking for these interactions (red dashed lines in Extended Data Figure 3b point to longer H–I distances of >3 Å; see Table S5 for distances and angles), indicating the distinctive nature of the two hydrogen atoms in AzOH. The above analysis indicates that, at the organic-inorganic interface, the molecular asymmetry of AzOH extends to the observed local symmetry breaking in (AzOH)<sub>2</sub>PbI<sub>4</sub> through noncovalent interactions, seemingly pointing to a broader pattern of the previously explored *chirality transfer* phenomenon in 2DHPs.<sup>11</sup>

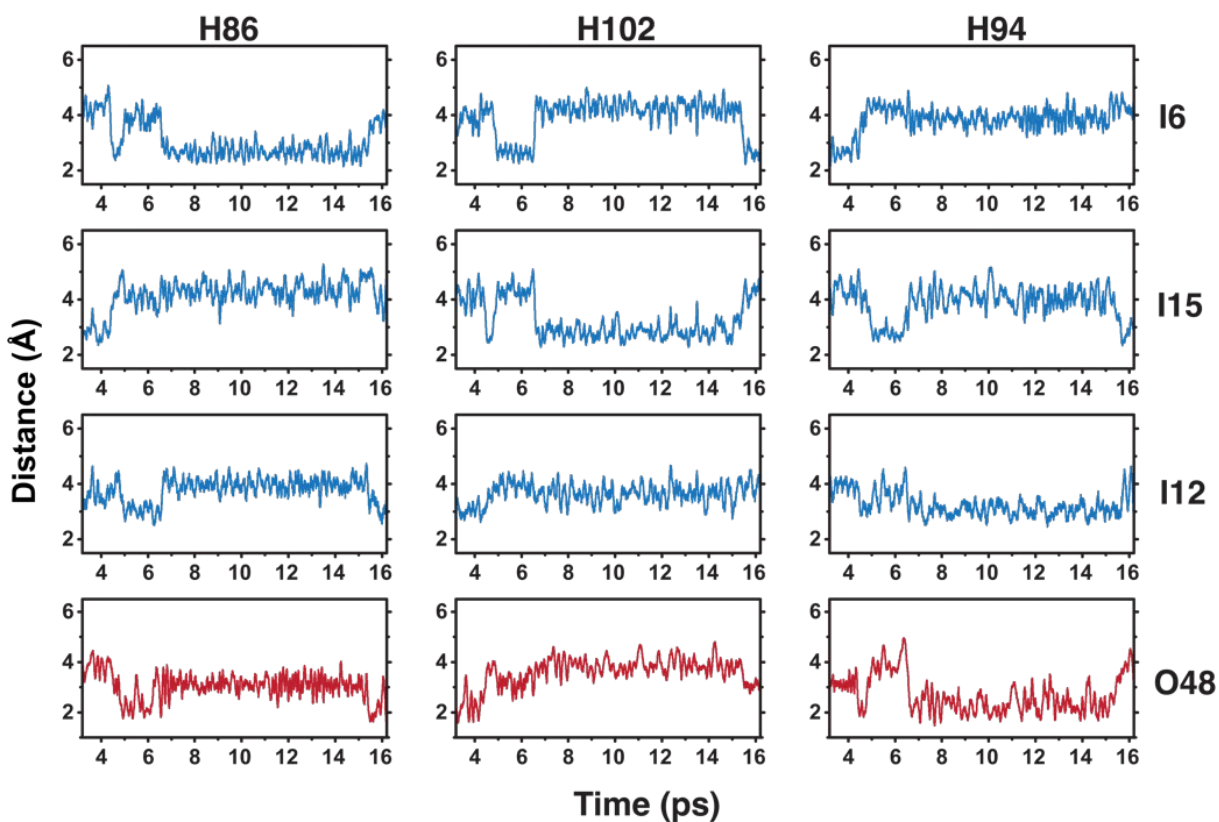

**Figure S13.** Evolution of interatomic distances involving the EOA-NH<sub>3</sub><sup>+</sup> group that contributes to non-covalent interactions in (EOA)<sub>2</sub>PbI<sub>4</sub>, simulated using AIMD at 300 K; the hydrogen, oxygen, and iodine indices correspond to those of an ammonium group, and the iodine and oxygen atoms closest to it in the static structure, respectively.

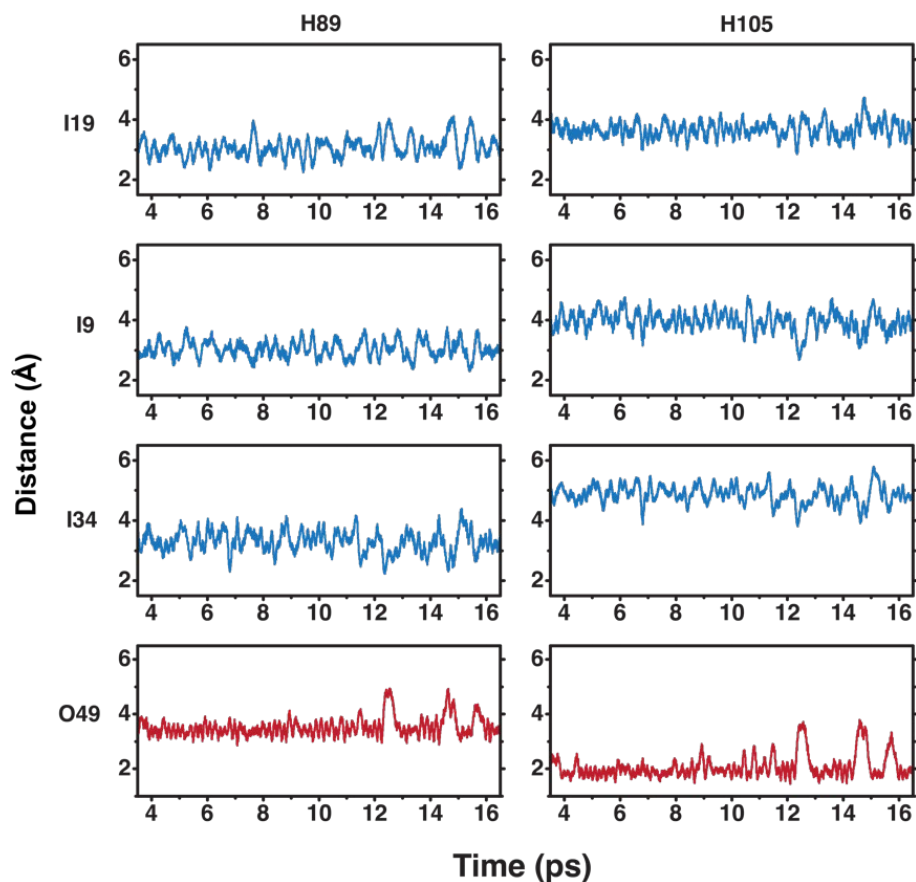

**Figure S14.** Evolution of interatomic distances involving the  $\text{AzOH-NH}_2^+$  group that contribute to non-covalent interactions in  $(\text{AzOH})_2\text{PbI}_4$ , simulated using AIMD at 300 K; the hydrogen, oxygen, and iodine indices correspond to those of an ammonium group, and the iodine and oxygen atoms closest to it in the static structure, respectively.

The structural origin of the symmetry transfer, which ultimately results in the spin-valley formation, can further be understood by considering the limited dynamics of the nonprimary ammonium group. Extended Data Figure 3e shows the dynamics of H-I distances between three hydrogen atoms (labeled H1, H2, H3 in Extended Data Figure 3c) of  $\text{EOA-NH}_3^+$  and one iodine from the Pb-I layer (labeled I1 in Extended Data Figure 3a), simulated using ab initio molecular dynamics (AIMD; see Supporting Methods for details). For different hydrogen atoms, the individual distances each fall into the expected range of N-H $\cdots$ I interactions at different times (Figure S13 shows the interaction dynamics from Extended Data Figure 3e). The periodic

switching of the hydrogen atom indices indicates that the C-N bond can undergo discrete (stepwise) rotations at room temperature, breaking and reforming N-H $\cdots$ I and N-H $\cdots$ O non-covalent interactions over different periods. Extended Data Figure 3f shows the dynamic changes in the AIMD simulations to the H-I distances involving AzOH-NH $_2^+$  and I1, which has the shortest distance in the static structure. The evolution of the H1-I1 distance indicates that it is the primary contributing factor towards the N-H $\cdots$ I1 interactions throughout the probed simulation time. However, in contrast to (EOA) $_2$ PbI $_4$ , the fluctuation of the H-I distance is larger in (AzOH) $_2$ PbI $_4$ ; consequently, the standard deviation of the H-I distance is also larger by  $\sim 0.1$  Å, consistent with a weaker H-bonding interaction in (AzOH) $_2$ PbI $_4$ . Also, unlike EOA, the hydrogen atom indices do not switch for a specific type of interaction (see Figure S14), indicating that the two hydrogen atoms in the AzOH -NH $_2^+$  group cannot rotate as readily, due to the restricted rotation of the C-N bonds (Extended Data Figure 3d).

The dynamics of the octahedral distortion parameters (bond distance variance,  $\lambda_{oct}$ , and bond angle variance,  $\sigma_{oct}^2$ ) for the Pb-I octahedra in (EOA) $_2$ PbI $_4$  and (AzOH) $_2$ PbI $_4$  can be used to track the resultant structural asymmetry. The distortion parameters are defined as follows:<sup>12</sup>

$$\lambda_{oct} = \frac{1}{6} \sum_{i=1}^6 \left( \frac{d_i}{d_0} \right)^2 \quad ; d_i: \text{Pb - I distances in the distorted octahedron, and } d_0: \text{Pb - I distance in an ideal octahedron of the same volume.}$$

$$\sigma_{oct}^2 = \frac{1}{11} \sum_{i=1}^{12} (\alpha_i - 90)^2 \quad ; \alpha_i: \text{I - Pb - I angles in the distorted octahedron (following Robinson et al.'s approach of using the unbiased estimator<sup>13</sup>).$$

In the static room temperature structure, (AzOH) $_2$ PbI $_4$  provides larger  $\lambda_{oct}$  and  $\sigma_{oct}^2$  values, compared to (EOA) $_2$ PbI $_4$ . This difference remains well maintained throughout the probed time

window (Extended Data Figure 3g), indicating that the octahedra in  $(\text{AzOH})_2\text{PbI}_4$  remain anisotropically distorted over time. The structural anisotropy of the Pb–I layers is also reflected in the distributions of Pb–I–Pb angles from the AIMD simulation (Extended Data Figure 3h). Gaussian fitting of the distributions suggests the existence of one Pb–I–Pb angle in  $(\text{EOA})_2\text{PbI}_4$ , while two such angles exist in  $(\text{AzOH})_2\text{PbI}_4$ . Thus, the interaction asymmetry and restricted dynamics lead to the observed dissymmetry for the Pb–I bond lengths in  $(\text{AzOH})_2\text{PbI}_4$  compared to  $(\text{EOA})_2\text{PbI}_4$ .

Like  $(\text{AzOH})_2\text{PbI}_4$ ,  $(\text{AzF}_2)_2\text{PbI}_4$  possesses a secondary ammonium group and inversion asymmetric Pb–I layers. However, the difference in the distortion patterns of their respective inorganic layers highlights the crucial role that the intermolecular interactions play. Specifically, the N–H $\cdots$ O non-covalent interactions in  $(\text{AzOH})_2\text{PbI}_4$  allow for an inversion-symmetric relationship between the two AzOH cations separating the Pb–I layers (see Figure 2c) and induce rigidity within the organic sublattice. The N–H $\cdots$ I interactions then imprint polar distortions in the Pb–I layers, while still maintaining overall inversion symmetry in the unit cell, leading to the HSP with the layer-dependent spin valleys. In contrast, analogous N–H $\cdots$ F non-covalent interactions are absent in the SCXRD-derived structure of  $(\text{AzF}_2)_2\text{PbI}_4$  (Extended Data Figure 1), presumably allowing some flexibility for the AzF<sub>2</sub> cations to assume three distinct configurations relative to the Pb–I layer, and ultimately to a reduced degree of polar displacements within the inorganic sublattice and near absence of spin valleys.

#### **D. Supplementary Data: Atomic positions used in DFT calculations.**

##### **1. DFT-relaxed $(\text{EOA})_2\text{PbI}_4$**

```
lattice_vector 20.4144879999999986 0.0000000000000000 0.0000000000000000  
lattice_vector 0.0000048684297949 8.99807999999986836 0.0000000000000000
```

lattice\_vector -1.6027149812312760 -0.0000003818359338 8.8004686038243261  
atom 4.3021832621060483 4.4990038167560291 4.4003575084726165 Pb  
atom 14.5094272621060476 4.4990038167560291 4.4003575084726165 Pb  
atom 5.1038129626236381 8.9980530057495187 0.0002112112464918 Pb  
atom 15.3110569626236384 8.9980530057495187 0.0002112112464918 Pb  
atom 7.4101296614588241 4.1435256414834170 5.0178687894657603 I  
atom 17.6173736614588208 4.1435256414834170 5.0178687894657603 I  
atom 1.1942629270435432 4.8545629747597134 3.7825910138899599 I  
atom 11.4015069270435436 4.8545629747597134 3.7825910138899599 I  
atom 0.3927301664025372 8.6425655041627198 8.1827901139277088 I  
atom 10.5999741664025358 8.6425655041627198 8.1827901139277088 I  
atom 8.2118885841730744 0.3555051159207930 0.6176608889594103 I  
atom 18.4191325841730738 0.3555051159207930 0.6176608889594103 I  
atom 3.7578828426979847 1.7392206239288222 6.0641212999000196 I  
atom 13.9651268426979840 1.7392206239288222 6.0641212999000196 I  
atom 4.8466650479971607 7.2586160460724001 2.7363825057987206 I  
atom 15.0539090479971609 7.2586160460724001 2.7363825057987206 I  
atom 4.0452325193840046 6.2383685543465646 7.1368016175515647 I  
atom 14.2524765193840040 6.2383685543465646 7.1368016175515647 I  
atom 4.5592032617939724 2.7595041079674032 1.6638693970506502 I  
atom 14.7664472617939708 2.7595041079674032 1.6638693970506502 I  
atom 7.4264855427189795 0.2958386310497960 5.6049920523699024 C  
atom 17.6337295427189780 0.2958386310497960 5.6049920523699024 C  
atom 1.1780563580690513 8.7022679813548631 3.1954325491114051 C  
atom 11.3853003580690508 8.7022679813548631 3.1954325491114051 C  
atom 0.3766919452074365 4.7948785446763225 7.5956932524293785 C  
atom 10.5839359452074362 4.7948785446763225 7.5956932524293785 C  
atom 8.2278419420056892 4.2032280677264273 1.2047753513949464 C  
atom 18.4350859420056850 4.2032280677264273 1.2047753513949464 C  
atom 8.2737470764408485 0.8683684482327192 5.9981177853713366 H  
atom 18.4809910764408443 0.8683684482327192 5.9981177853713366 H  
atom 0.3307916189074834 8.1297201680111773 2.8023244170471759 H  
atom 10.5380356189074824 8.1297201680111773 2.8023244170471759 H  
atom -0.4705705716876429 5.3674173940528513 7.2025763198965471 H  
atom 9.7366734283123559 5.3674173940528513 7.2025763198965471 H  
atom 9.0751044589007677 3.6306892183499002 1.5978922839277792 H  
atom 19.2823484589007634 3.6306892183499002 1.5978922839277792 H  
atom 6.5245201759504363 0.5726735361740507 6.1617272971850365 H  
atom 16.7317641759504347 0.5726735361740507 6.1617272971850365 H  
atom 2.0800217248521990 8.4254600704706082 2.6386973042962705 H  
atom 12.2872657248521957 8.4254600704706082 2.6386973042962705 H  
atom 1.2786576115304638 5.0716955019519867 7.0389580076142435 H  
atom 11.4859016115304637 5.0716955019519867 7.0389580076142435 H  
atom 7.3258558611897913 3.9264021123707633 1.7615105962100810 H  
atom 17.5330998611897932 3.9264021123707633 1.7615105962100810 H  
atom 8.8272687100711575 7.4659677054880840 4.9513724486952650 O

atom 19.0345127100711551 7.4659677054880840 4.9513724486952650 O  
atom -0.2227300147130895 1.5321389069158120 3.8490697537232488 O  
atom 9.9845139852869096 1.5321389069158120 3.8490697537232488 O  
atom -1.0240883317579725 2.9669095662372529 8.2493128561040159 O  
atom 9.1831556682420263 2.9669095662372529 8.2493128561040159 O  
atom 9.6286254243961888 6.0311880480862596 0.5511381467831022 O  
atom 19.8358694243961899 6.0311880480862596 0.5511381467831022 O  
atom 7.6572587829188326 7.8082636341004426 5.7042877396268503 C  
atom 17.8645027829188336 7.8082636341004426 5.7042877396268503 C  
atom 0.9472627033811957 1.1898429783042168 3.0961368618544554 C  
atom 11.1545067033811947 1.1898429783042168 3.0961368618544554 C  
atom 0.1459235685189440 3.3092235563451764 7.4963887647038252 C  
atom 10.3531675685189413 3.3092235563451764 7.4963887647038252 C  
atom 8.4586151268391223 5.6888830560587191 1.3040534377146884 C  
atom 18.6658591268391234 5.6888830560587191 1.3040534377146884 C  
atom 6.7852770100848359 7.2577431201358760 5.3218017731674374 H  
atom 16.9925210100848325 7.2577431201358760 5.3218017731674374 H  
atom 1.8192288698818742 1.7403814884299285 3.4785964269080569 H  
atom 12.0264728698818750 1.7403814884299285 3.4785964269080569 H  
atom 1.0178891392796054 2.7586850130310490 7.8788483297574272 H  
atom 11.2251331392796061 2.7586850130310490 7.8788483297574272 H  
atom 7.5866307443005754 6.2394126012932283 0.9215850721924834 H  
atom 17.7938747443005738 6.2394126012932283 0.9215850721924834 H  
atom 7.7743642495335914 7.5514673828218601 6.7681411872687596 H  
atom 17.9816082495335898 7.5514673828218601 6.7681411872687596 H  
atom 0.8301164077807008 1.4466212334227979 2.0322834142125479 H  
atom 11.0373604077807013 1.4466212334227979 2.0322834142125479 H  
atom 0.0287769950528182 3.0524363954638325 6.4325353170619186 H  
atom 10.2360209950528187 3.0524363954638325 6.4325353170619186 H  
atom 8.5757600975951362 5.9456792150196813 2.3679156858251993 H  
atom 18.7830040975951356 5.9456792150196813 2.3679156858251993 H  
atom 7.2344910308431949 0.7234364523817269 4.1840507906592181 N  
atom 17.4417350308431942 0.7234364523817269 4.1840507906592181 N  
atom 1.3700696817227218 8.2746791581025487 4.6163826112906916 N  
atom 11.5773136817227211 8.2746791581025487 4.6163826112906916 N  
atom 2.1714207127782141 5.2224496302998178 0.2161747107843407 N  
atom 12.3786647127782121 5.2224496302998178 0.2161747107843407 N  
atom 6.4331335889034351 3.7756209897829316 8.5842938930399857 N  
atom 16.6403775889034371 3.7756209897829316 8.5842938930399857 N  
atom 6.5213389127277885 0.1449769044101874 3.7003154329128063 H  
atom 16.7285829127277914 0.1449769044101874 3.7003154329128063 H  
atom 2.0832217998527343 8.8531657003140882 5.1001179690371048 H  
atom 12.2904657998527327 8.8531657003140882 5.1001179690371048 H  
atom 2.8845549958674854 4.6439630461122903 0.6998924675935448 H  
atom 13.0917989958674852 4.6439630461122903 0.6998924675935448 H  
atom 5.7199836994565052 4.3540805797316047 8.1005497348249698 H

atom 15.9272276994565019 4.3540805797316047 8.1005497348249698 H  
 atom 6.9472421541874469 1.7220433717598445 4.1615039900962207 H  
 atom 17.1544861541874454 1.7220433717598445 4.1615039900962207 H  
 atom 1.6573577846492242 7.2760902348840508 4.6389382123222944 H  
 atom 11.8646017846492224 7.2760902348840508 4.6389382123222944 H  
 atom 2.4587098962867882 6.2210475496410256 0.2387303118159425 H  
 atom 12.6659538962867870 6.2210475496410256 0.2387303118159425 H  
 atom 6.1458820289408980 2.7770230704409595 8.5617558929455910 H  
 atom 16.3531260289408955 2.7770230704409595 8.5617558929455910 H  
 atom 8.1303769414227371 0.6772763245722930 3.6633886666511590 H  
 atom 18.3376209414227347 0.6772763245722930 3.6633886666511590 H  
 atom 0.4741617539353312 8.3208302878316012 5.1370535357673539 H  
 atom 10.6814057539353300 8.3208302878316012 5.1370535357673539 H  
 atom 1.2755127350504705 5.1762984553888849 0.7368456352610030 H  
 atom 11.4827567350504705 5.1762984553888849 0.7368456352610030 H  
 atom 7.3290195494330659 3.8217811627734846 8.0636317690319270 H  
 atom 17.5362635494330661 3.8217811627734846 8.0636317690319270 H  
 atom 8.8059196141342007 6.4960286759176125 4.8142523473790773 H  
 atom 19.0131636141342035 6.4960286759176125 4.8142523473790773 H  
 atom -0.2014013332690013 2.5020689384062842 3.9861898550394357 H  
 atom 10.0058426667309988 2.5020689384062842 3.9861898550394357 H  
 atom -1.0027402853911902 1.9969795228480092 8.3864329574202028 H  
 atom 9.2045037146088085 1.9969795228480092 8.3864329574202028 H  
 atom 9.6072773780294085 7.0011180914755036 0.4140180454669154 H  
 atom 19.8145213780294078 7.0011180914755036 0.4140180454669154 H

## 2. DFT- relaxed (AzOH)<sub>2</sub>PbI<sub>4</sub>

lattice\_vector 20.34411170 0.00000094 0.00000286  
 lattice\_vector 0.00002811 12.90436412 -0.05106798  
 lattice\_vector -0.00001386 -0.07559081 12.90382287  
 atom 5.08616623 0.42303369 3.78218416 Pb  
 atom 5.08610359 0.38536975 10.23417779 Pb  
 atom 5.08621804 6.87513558 3.75663146 Pb  
 atom 5.08627409 6.83756196 10.20873893 Pb  
 atom 15.25793525 5.99125617 2.64407598 Pb  
 atom 15.25794359 5.95363760 9.09604705 Pb  
 atom 15.25796374 12.44340358 2.61859118 Pb  
 atom 15.25785689 12.40572324 9.07058371 Pb  
 atom 5.08612380 3.58291425 3.86042943 I  
 atom 5.08611956 3.54535461 10.31230395 I  
 atom 5.08614184 10.03531740 3.83482308 I  
 atom 5.08613822 9.99755206 10.28671299 I  
 atom 15.25797430 2.83121019 2.56605412 I  
 atom 15.25799425 2.79347120 9.01794520 I  
 atom 15.25799710 9.28344817 2.54043419 I  
 atom 15.25800983 9.24586250 8.99233412 I

|      |             |             |               |
|------|-------------|-------------|---------------|
| atom | 8.27732167  | 0.46486080  | 3.95293993 I  |
| atom | 8.27744588  | 0.42711092  | 10.40484647 I |
| atom | 8.27749523  | 6.91706075  | 3.92741480 I  |
| atom | 8.27742531  | 6.87930647  | 10.37932417 I |
| atom | 18.44921251 | 5.94944915  | 2.47349006 I  |
| atom | 18.44930879 | 5.91169174  | 8.92540604 I  |
| atom | 18.44918858 | 12.40166282 | 2.44797831 I  |
| atom | 18.44927166 | 12.36389838 | 8.89989388 I  |
| atom | 12.06664967 | 5.94946986  | 2.47342409 I  |
| atom | 12.06668124 | 5.91169484  | 8.92533791 I  |
| atom | 12.06672767 | 12.40167719 | 2.44791166 I  |
| atom | 12.06675732 | 12.36391001 | 8.89982626 I  |
| atom | 1.89490387  | 0.46486889  | 3.95288288 I  |
| atom | 1.89487319  | 0.42711399  | 10.40476658 I |
| atom | 1.89488728  | 6.91707618  | 3.92734352 I  |
| atom | 1.89487052  | 6.87932622  | 10.37925276 I |
| atom | 5.08613668  | 6.38403753  | 0.57626554 I  |
| atom | 5.08612801  | 6.34622914  | 7.02818499 I  |
| atom | 5.08612659  | 12.83620085 | 0.55071578 I  |
| atom | 5.08611903  | 12.79839287 | 7.00248376 I  |
| atom | 15.25799656 | 0.03037368  | 5.85020357 I  |
| atom | 15.25799274 | -0.00742771 | 12.30212814 I |
| atom | 15.25800545 | 6.48252609  | 5.82448589 I  |
| atom | 15.25799262 | 6.44472503  | 12.27652279 I |
| atom | 9.75212139  | 2.79378988  | 1.76542522 O  |
| atom | 9.75212374  | 2.75599714  | 8.21733067 O  |
| atom | 9.75212315  | 9.24597604  | 1.73989493 O  |
| atom | 9.75212566  | 9.20818214  | 8.19179526 O  |
| atom | 19.92414048 | 3.62059935  | 4.66094601 O  |
| atom | 19.92412570 | 3.58280413  | 11.11285093 O |
| atom | 19.92417416 | 10.07277847 | 4.63541295 O  |
| atom | 19.92415688 | 10.03498452 | 11.08732135 O |
| atom | 10.59200561 | 3.62059426  | 4.66096321 O  |
| atom | 10.59200772 | 3.58280519  | 11.11286576 O |
| atom | 10.59200718 | 10.07277083 | 4.63542661 O  |
| atom | 10.59200612 | 10.03498546 | 11.08733712 O |
| atom | 0.41996409  | 2.79379336  | 1.76543214 O  |
| atom | 0.41995485  | 2.75600247  | 8.21734654 O  |
| atom | 0.41999241  | 9.24596756  | 1.73990611 O  |
| atom | 0.41997934  | 9.20817415  | 8.19181617 O  |
| atom | 9.55758840  | 2.06541797  | 2.40206969 H  |
| atom | 9.55759840  | 2.02762617  | 8.85397850 H  |
| atom | 9.55759242  | 8.51760851  | 2.37654457 H  |
| atom | 9.55760169  | 8.47981372  | 8.82844718 H  |
| atom | 19.72959596 | 4.34896554  | 4.02429680 H  |
| atom | 19.72958082 | 4.31117194  | 10.47620598 H |

|      |             |             |               |
|------|-------------|-------------|---------------|
| atom | 19.72963077 | 10.80115016 | 3.99876896 H  |
| atom | 19.72961144 | 10.76335638 | 10.45068271 H |
| atom | 10.78652752 | 4.34895841  | 4.02430849 H  |
| atom | 10.78654003 | 4.31117032  | 10.47621225 H |
| atom | 10.78653255 | 10.80114522 | 3.99878205 H  |
| atom | 10.78653714 | 10.76336002 | 10.45069486 H |
| atom | 0.61450794  | 2.06542454  | 2.40207668 H  |
| atom | 0.61449963  | 2.02763319  | 8.85399198 H  |
| atom | 0.61453725  | 8.51759725  | 2.37654856 H  |
| atom | 0.61452285  | 8.47980401  | 8.82846128 H  |
| atom | 8.13472097  | 3.96914325  | 5.99006968 N  |
| atom | 8.13471721  | 3.93136436  | 12.44198149 N |
| atom | 8.13473251  | 10.42134198 | 5.96453406 N  |
| atom | 8.13472165  | 10.38354926 | 12.41644833 N |
| atom | 18.30677211 | 2.44521424  | 0.43632168 N  |
| atom | 18.30676456 | 2.40743003  | 6.88823281 N  |
| atom | 18.30679575 | 8.89740663  | 0.41078516 N  |
| atom | 18.30678915 | 8.85961970  | 6.86269326 N  |
| atom | 12.20940786 | 2.44522159  | 0.43631409 N  |
| atom | 12.20940358 | 2.40743387  | 6.88822599 N  |
| atom | 12.20940982 | 8.89741346  | 0.41077596 N  |
| atom | 12.20940545 | 8.85962827  | 6.86268922 N  |
| atom | 2.03733377  | 3.96915882  | 5.99005815 N  |
| atom | 2.03732636  | 3.93136914  | 12.44196984 N |
| atom | 2.03735735  | 10.42134126 | 5.96453187 N  |
| atom | 2.03735049  | 10.38355842 | 12.41644158 N |
| atom | 7.43080865  | 4.48058864  | 5.43527878 H  |
| atom | 7.43080605  | 4.44281602  | 11.88719485 H |
| atom | 7.43082712  | 10.93279705 | 5.40974525 H  |
| atom | 7.43081387  | 10.89500213 | 11.86165920 H |
| atom | 17.60288665 | 1.93373501  | 0.99111528 H  |
| atom | 17.60287855 | 1.89595489  | 7.44302856 H  |
| atom | 17.60290840 | 8.38593706  | 0.96558720 H  |
| atom | 17.60289808 | 8.34815428  | 7.41749368 H  |
| atom | 12.91331880 | 1.93376375  | 0.99109479 H  |
| atom | 12.91331279 | 1.89597784  | 7.44300881 H  |
| atom | 12.91332212 | 8.38596870  | 0.96556740 H  |
| atom | 12.91331653 | 8.34818509  | 7.41748411 H  |
| atom | 2.74122040  | 4.48062545  | 5.43525314 H  |
| atom | 2.74121366  | 4.44283971  | 11.88716946 H |
| atom | 2.74124478  | 10.93281401 | 5.40973585 H  |
| atom | 2.74123610  | 10.89503600 | 11.86164649 H |
| atom | 8.87108956  | 3.60549761  | 5.35107261 H  |
| atom | 8.87108451  | 3.56771958  | 11.80298307 H |
| atom | 8.87110229  | 10.05769704 | 5.32553714 H  |
| atom | 8.87109038  | 10.01990206 | 11.77745185 H |

|      |             |             |               |
|------|-------------|-------------|---------------|
| atom | 19.04313742 | 2.80887301  | 1.07531584 H  |
| atom | 19.04312984 | 2.77108979  | 7.52722670 H  |
| atom | 19.04316213 | 9.26106642  | 1.04977698 H  |
| atom | 19.04315603 | 9.22327539  | 7.50168709 H  |
| atom | 11.47304265 | 2.80886649  | 1.07531552 H  |
| atom | 11.47303797 | 2.77107958  | 7.52722698 H  |
| atom | 11.47303987 | 9.26105864  | 1.04977153 H  |
| atom | 11.47303341 | 9.22327254  | 7.50168364 H  |
| atom | 1.30096356  | 3.60550065  | 5.35106908 H  |
| atom | 1.30095988  | 3.56770964  | 11.80297887 H |
| atom | 1.30099190  | 10.05768392 | 5.32553640 H  |
| atom | 1.30098597  | 10.01990024 | 11.77744668 H |
| atom | 8.55429489  | 3.54073775  | 1.60555670 C  |
| atom | 8.55429301  | 3.50293751  | 8.05746782 C  |
| atom | 8.55429791  | 9.99292441  | 1.58002448 C  |
| atom | 8.55429815  | 9.95512626  | 8.03193182 C  |
| atom | 18.72632296 | 2.87364019  | 4.82082787 C  |
| atom | 18.72630918 | 2.83584284  | 11.27273871 C |
| atom | 18.72635169 | 9.32582433  | 4.79528915 C  |
| atom | 18.72633713 | 9.28802493  | 11.24720210 C |
| atom | 11.78983349 | 2.87364967  | 4.82082877 C  |
| atom | 11.78983020 | 2.83585386  | 11.27273842 C |
| atom | 11.78983973 | 9.32583395  | 4.79529077 C  |
| atom | 11.78983307 | 9.28803819  | 11.24720085 C |
| atom | 1.61778429  | 3.54075120  | 1.60555219 C  |
| atom | 1.61777646  | 3.50295844  | 8.05746510 C  |
| atom | 1.61780898  | 9.99292998  | 1.58002314 C  |
| atom | 1.61779873  | 9.95513104  | 8.03193685 C  |
| atom | 8.08583962  | 3.75207906  | 2.57286440 H  |
| atom | 8.08584074  | 3.71427869  | 9.02477718 H  |
| atom | 8.08584318  | 10.20426731 | 2.54733225 H  |
| atom | 8.08584461  | 10.16646533 | 8.99924100 H  |
| atom | 18.25787027 | 2.66228035  | 3.85352316 H  |
| atom | 18.25785231 | 2.62448530  | 10.30543529 H |
| atom | 18.25790029 | 9.11446569  | 3.82798334 H  |
| atom | 18.25788474 | 9.07666443  | 10.27989709 H |
| atom | 12.25828642 | 2.66230847  | 3.85351973 H  |
| atom | 12.25828778 | 2.62451137  | 10.30543199 H |
| atom | 12.25829454 | 9.11449514  | 3.82798196 H  |
| atom | 12.25828694 | 9.07669872  | 10.27989217 H |
| atom | 2.08623747  | 3.75211077  | 2.57285689 H  |
| atom | 2.08622887  | 3.71431822  | 9.02477035 H  |
| atom | 2.08626253  | 10.20428699 | 2.54732812 H  |
| atom | 2.08625077  | 10.16648949 | 8.99924242 H  |
| atom | 8.77270756  | 4.75853397  | 0.69171467 C  |
| atom | 8.77269612  | 4.72073222  | 7.14362120 C  |

|      |             |             |               |
|------|-------------|-------------|---------------|
| atom | 8.77271125  | 11.21072029 | 0.66618184 C  |
| atom | 8.77270709  | 11.17292353 | 7.11808999 C  |
| atom | 18.94475132 | 1.65585087  | 5.73467807 C  |
| atom | 18.94474370 | 1.61805152  | 12.18658483 C |
| atom | 18.94477375 | 8.10803526  | 5.70914010 C  |
| atom | 18.94476638 | 8.07023605  | 12.16105241 C |
| atom | 11.57142412 | 1.65585353  | 5.73467191 C  |
| atom | 11.57141289 | 1.61805688  | 12.18657914 C |
| atom | 11.57143660 | 8.10803847  | 5.70913601 C  |
| atom | 11.57142357 | 8.07024035  | 12.16104181 C |
| atom | 1.39935664  | 4.75854051  | 0.69170282 C  |
| atom | 1.39935363  | 4.72074594  | 7.14361158 C  |
| atom | 1.39937696  | 11.21072186 | 0.66617698 C  |
| atom | 1.39937144  | 11.17292042 | 7.11808721 C  |
| atom | 9.80260744  | 5.06067452  | 0.48680823 H  |
| atom | 9.80259402  | 5.02287782  | 6.93871254 H  |
| atom | 9.80261147  | 11.51286061 | 0.46127759 H  |
| atom | 9.80260715  | 11.47506403 | 6.91318514 H  |
| atom | 19.97465495 | 1.35372366  | 5.93958759 H  |
| atom | 19.97464832 | 1.31592416  | 12.39148903 H |
| atom | 19.97467708 | 7.80590712  | 5.91405002 H  |
| atom | 19.97467071 | 7.76810849  | 12.36595808 H |
| atom | 10.54152461 | 1.35371379  | 5.93958028 H  |
| atom | 10.54151195 | 1.31592073  | 12.39148545 H |
| atom | 10.54153817 | 7.80589224  | 5.91404077 H  |
| atom | 10.54152420 | 7.76809678  | 12.36594581 H |
| atom | 0.36945284  | 5.06067098  | 0.48679844 H  |
| atom | 0.36945140  | 5.02287932  | 6.93870393 H  |
| atom | 0.36947255  | 11.51284900 | 0.46127161 H  |
| atom | 0.36946728  | 11.47504589 | 6.91317716 H  |
| atom | 8.15400889  | 5.61790019  | 0.96421997 H  |
| atom | 8.15399293  | 5.58009613  | 7.41612372 H  |
| atom | 8.15401275  | 12.07008710 | 0.93868695 H  |
| atom | 8.15400847  | 12.03228998 | 7.39059568 H  |
| atom | 18.32606584 | 0.79647449  | 5.46217211 H  |
| atom | 18.32605802 | 0.75867544  | 11.91407857 H |
| atom | 18.32608465 | 7.24866117  | 5.43663449 H  |
| atom | 18.32607843 | 7.21086127  | 11.88854828 H |
| atom | 12.19012069 | 0.79648591  | 5.46216568 H  |
| atom | 12.19010689 | 0.75868725  | 11.91407176 H |
| atom | 12.19014295 | 7.24867609  | 5.43663630 H  |
| atom | 12.19012608 | 7.21087686  | 11.88853566 H |
| atom | 2.01804731  | 5.61791361  | 0.96420689 H  |
| atom | 2.01804630  | 5.58011826  | 7.41611347 H  |
| atom | 2.01806265  | 12.07009762 | 0.93868425 H  |
| atom | 2.01805606  | 12.03229708 | 7.39059358 H  |

|      |             |             |               |
|------|-------------|-------------|---------------|
| atom | 7.60429782  | 2.98015538  | 0.52020967 C  |
| atom | 7.60429378  | 2.94234618  | 6.97212578 C  |
| atom | 7.60430078  | 9.43234112  | 0.49467732 C  |
| atom | 7.60429955  | 9.39454215  | 6.94658524 C  |
| atom | 17.77631820 | 3.43421984  | 5.90617188 C  |
| atom | 17.77630965 | 3.39641767  | 12.35808887 C |
| atom | 17.77634733 | 9.88640892  | 5.88063071 C  |
| atom | 17.77633492 | 9.84860490  | 12.33254678 C |
| atom | 12.73983248 | 3.43423495  | 5.90617388 C  |
| atom | 12.73982693 | 3.39643381  | 12.35808782 C |
| atom | 12.73983566 | 9.88642502  | 5.88063522 C  |
| atom | 12.73983024 | 9.84862135  | 12.33254740 C |
| atom | 2.56778689  | 2.98017066  | 0.52020781 C  |
| atom | 2.56777851  | 2.94237227  | 6.97212215 C  |
| atom | 2.56781249  | 9.43235606  | 0.49467595 C  |
| atom | 2.56780376  | 9.39455169  | 6.94659229 C  |
| atom | 6.54641530  | 3.17864576  | 0.71420284 H  |
| atom | 6.54641062  | 3.14083429  | 7.16612006 H  |
| atom | 6.54641758  | 9.63083074  | 0.68867013 H  |
| atom | 6.54641714  | 9.59303346  | 7.14057988 H  |
| atom | 16.71843729 | 3.23571771  | 5.71217754 H  |
| atom | 16.71842769 | 3.19791944  | 12.16409658 H |
| atom | 16.71846573 | 9.68790959  | 5.68663703 H  |
| atom | 16.71845332 | 9.65010565  | 12.13855388 H |
| atom | 13.79771553 | 3.23574769  | 5.71217839 H  |
| atom | 13.79771076 | 3.19794766  | 12.16409460 H |
| atom | 13.79771875 | 9.68793512  | 5.68664356 H  |
| atom | 13.79771273 | 9.65012922  | 12.13855466 H |
| atom | 3.62566826  | 3.17867077  | 0.71420025 H  |
| atom | 3.62566063  | 3.14087197  | 7.16611334 H  |
| atom | 3.62569326  | 9.63085828  | 0.68867124 H  |
| atom | 3.62568389  | 9.59305602  | 7.14058813 H  |
| atom | 7.75290221  | 1.95188772  | 0.18031342 H  |
| atom | 7.75289847  | 1.91407819  | 6.63222991 H  |
| atom | 7.75290536  | 8.40407293  | 0.15478256 H  |
| atom | 7.75290257  | 8.36627462  | 6.60668756 H  |
| atom | 17.92491023 | 4.46249151  | 6.24606365 H  |
| atom | 17.92490615 | 4.42468789  | 12.69798416 H |
| atom | 17.92494155 | 10.91468100 | 6.22052045 H  |
| atom | 17.92492960 | 10.87687742 | 12.67243543 H |
| atom | 12.59122674 | 4.46250160  | 6.24607352 H  |
| atom | 12.59121923 | 4.42470047  | 12.69798549 H |
| atom | 12.59123127 | 10.91469359 | 6.22052926 H  |
| atom | 12.59122820 | 10.87688925 | 12.67244391 H |
| atom | 2.41919212  | 1.95189823  | 0.18031905 H  |
| atom | 2.41918329  | 1.91409941  | 6.63223501 H  |

|      |            |            |            |   |
|------|------------|------------|------------|---|
| atom | 2.41922122 | 8.40408482 | 0.15478211 | H |
| atom | 2.41921401 | 8.36627968 | 6.60670027 | H |

### 3. DFT- relaxed (AzOH)<sub>2</sub>SnI<sub>4</sub>

|                |             |             |             |    |
|----------------|-------------|-------------|-------------|----|
| lattice_vector | 20.30554722 | 0.00000010  | -0.00000002 |    |
| lattice_vector | 0.00000039  | 12.74848098 | 0.00059883  |    |
| lattice_vector | -0.00000008 | -0.27959758 | 12.87231134 |    |
| atom           | 5.07640575  | 0.42143802  | 0.51661924  | Sn |
| atom           | 15.22914433 | 12.04744013 | 12.35629422 | Sn |
| atom           | 5.07640237  | 0.28166045  | 6.95277442  | Sn |
| atom           | 15.22914576 | 12.18723123 | 5.92013040  | Sn |
| atom           | 5.07640700  | 6.79566625  | 0.51691069  | Sn |
| atom           | 15.22914097 | 5.67321886  | 12.35599435 | Sn |
| atom           | 5.07640210  | 6.65586762  | 6.95308292  | Sn |
| atom           | 15.22914560 | 5.81301299  | 5.91982722  | Sn |
| atom           | 12.12374903 | 0.71121082  | 2.24021818  | H  |
| atom           | 8.18179760  | 11.75767253 | 10.63269218 | H  |
| atom           | 1.97097559  | 11.75767206 | 10.63269224 | H  |
| atom           | 18.33457173 | 0.71121134  | 2.24021766  | H  |
| atom           | 12.12374898 | 0.57141324  | 8.67637495  | H  |
| atom           | 8.18179821  | 11.89746983 | 4.19653546  | H  |
| atom           | 1.97097617  | 11.89746999 | 4.19653585  | H  |
| atom           | 18.33457111 | 0.57141394  | 8.67637479  | H  |
| atom           | 12.12374944 | 7.08545128  | 2.24051779  | H  |
| atom           | 8.18179842  | 5.38343189  | 10.63239281 | H  |
| atom           | 1.97097530  | 5.38343184  | 10.63239309 | H  |
| atom           | 18.33457221 | 7.08545167  | 2.24051706  | H  |
| atom           | 12.12374834 | 6.94565391  | 8.67667420  | H  |
| atom           | 8.18179843  | 5.52322961  | 4.19623627  | H  |
| atom           | 1.97097470  | 5.52322938  | 4.19623663  | H  |
| atom           | 18.33457144 | 6.94565431  | 8.67667396  | H  |
| atom           | 10.49347496 | 1.30658570  | 2.73723170  | H  |
| atom           | 9.81207164  | 11.16229778 | 10.13567864 | H  |
| atom           | 0.34070142  | 11.16229709 | 10.13567879 | H  |
| atom           | 19.96484583 | 1.30658642  | 2.73723114  | H  |
| atom           | 10.49347468 | 1.16678738  | 9.17338849  | H  |
| atom           | 9.81207257  | 11.30209555 | 3.69952206  | H  |
| atom           | 0.34070206  | 11.30209574 | 3.69952223  | H  |
| atom           | 19.96484536 | 1.16678826  | 9.17338830  | H  |
| atom           | 10.49347545 | 7.68082659  | 2.73753135  | H  |
| atom           | 9.81207231  | 4.78805624  | 10.13537934 | H  |
| atom           | 0.34070130  | 4.78805652  | 10.13537967 | H  |
| atom           | 19.96484614 | 7.68082718  | 2.73753048  | H  |
| atom           | 10.49347439 | 7.54102912  | 9.17368777  | H  |
| atom           | 9.81207259  | 4.92785487  | 3.69922272  | H  |

|      |             |             |               |
|------|-------------|-------------|---------------|
| atom | 0.34070068  | 4.92785441  | 3.69922300 H  |
| atom | 19.96484564 | 7.54102886  | 9.17368749 H  |
| atom | 12.89258829 | 1.79288143  | 4.21502554 H  |
| atom | 7.41295872  | 10.67600217 | 8.65788464 H  |
| atom | 2.73981477  | 10.67600191 | 8.65788533 H  |
| atom | 17.56573261 | 1.79288103  | 4.21502491 H  |
| atom | 12.89258727 | 1.65308509  | 10.65118114 H |
| atom | 7.41295971  | 10.81579835 | 2.22172976 H  |
| atom | 2.73981432  | 10.81579859 | 2.22172925 H  |
| atom | 17.56573266 | 1.65308559  | 10.65118077 H |
| atom | 12.89258969 | 8.16712247  | 4.21532537 H  |
| atom | 7.41295760  | 4.30176108  | 8.65758560 H  |
| atom | 2.73981544  | 4.30176094  | 8.65758541 H  |
| atom | 17.56573191 | 8.16712238  | 4.21532488 H  |
| atom | 12.89258833 | 8.02732590  | 10.65148052 H |
| atom | 7.41295905  | 4.44155770  | 2.22142977 H  |
| atom | 2.73981432  | 4.44155773  | 2.22143013 H  |
| atom | 17.56573232 | 8.02732641  | 10.65148063 H |
| atom | 2.45278110  | 1.86665441  | 3.40918218 H  |
| atom | 17.85276569 | 10.60222941 | 9.46372799 H  |
| atom | 12.60555500 | 10.60222889 | 9.46372828 H  |
| atom | 7.69999223  | 1.86665484  | 3.40918183 H  |
| atom | 2.45278260  | 1.72685768  | 9.84533591 H  |
| atom | 17.85276439 | 10.74202572 | 3.02757446 H  |
| atom | 12.60555693 | 10.74202547 | 3.02757474 H  |
| atom | 7.69999061  | 1.72685774  | 9.84533564 H  |
| atom | 2.45278105  | 8.24089430  | 3.40948149 H  |
| atom | 17.85276627 | 4.22798960  | 9.46342870 H  |
| atom | 12.60555364 | 4.22798886  | 9.46342910 H  |
| atom | 7.69999314  | 8.24089437  | 3.40948155 H  |
| atom | 2.45278206  | 8.10109726  | 9.84563534 H  |
| atom | 17.85276495 | 4.36778593  | 3.02727526 H  |
| atom | 12.60555566 | 4.36778548  | 3.02727516 H  |
| atom | 7.69999134  | 8.10109767  | 9.84563473 H  |
| atom | 0.63302453  | 1.93976822  | 5.61651982 H  |
| atom | 19.67252261 | 10.52911530 | 7.25639094 H  |
| atom | 10.78579853 | 10.52911521 | 7.25639099 H  |
| atom | 9.51974884  | 1.93976851  | 5.61651920 H  |
| atom | 0.63302625  | 1.79996974  | 12.05267519 H |
| atom | 19.67252085 | 10.66891398 | 0.82023491 H  |
| atom | 10.78579977 | 10.66891325 | 0.82023599 H  |
| atom | 9.51974745  | 1.79996992  | 12.05267523 H |
| atom | 0.63302369  | 8.31400944  | 5.61681756 H  |
| atom | 19.67252344 | 4.15487444  | 7.25609309 H  |
| atom | 10.78579643 | 4.15487361  | 7.25609331 H  |
| atom | 9.51975052  | 8.31400926  | 5.61681703 H  |

|      |             |             |               |
|------|-------------|-------------|---------------|
| atom | 0.63302476  | 8.17421080  | 12.05297287 H |
| atom | 19.67252206 | 4.29467271  | 0.81993701 H  |
| atom | 10.78579825 | 4.29467223  | 0.81993807 H  |
| atom | 9.51974893  | 8.17421139  | 12.05297263 H |
| atom | 12.22155473 | 2.57523256  | 0.63558806 H  |
| atom | 8.08399186  | 9.89365069  | 12.23732204 H |
| atom | 2.06878174  | 9.89365058  | 12.23732250 H |
| atom | 18.23676506 | 2.57523290  | 0.63558786 H  |
| atom | 12.22155250 | 2.43543380  | 7.07174291 H  |
| atom | 8.08399464  | 10.03344929 | 5.80116778 H  |
| atom | 2.06877978  | 10.03344946 | 5.80116772 H  |
| atom | 18.23676739 | 2.43543433  | 7.07174259 H  |
| atom | 12.22155626 | 8.94947276  | 0.63588726 H  |
| atom | 8.08399117  | 3.51941035  | 12.23702328 H |
| atom | 2.06878263  | 3.51941059  | 12.23702352 H |
| atom | 18.23676465 | 8.94947307  | 0.63588676 H  |
| atom | 12.22155370 | 8.80967419  | 7.07204187 H  |
| atom | 8.08399327  | 3.65920929  | 5.80086843 H  |
| atom | 2.06878016  | 3.65920917  | 5.80086874 H  |
| atom | 18.23676662 | 8.80967444  | 7.07204163 H  |
| atom | 11.47273528 | 2.69647771  | 4.31598068 H  |
| atom | 8.83281174  | 9.77240590  | 8.55692942 H  |
| atom | 1.31996166  | 9.77240561  | 8.55692980 H  |
| atom | 18.98558562 | 2.69647745  | 4.31598062 H  |
| atom | 11.47273422 | 2.55668061  | 10.75213627 H |
| atom | 8.83281256  | 9.91220250  | 2.12077435 H  |
| atom | 1.31996137  | 9.91220286  | 2.12077420 H  |
| atom | 18.98558567 | 2.55668120  | 10.75213607 H |
| atom | 11.47273615 | 9.07071835  | 4.31628015 H  |
| atom | 8.83281112  | 3.39816511  | 8.55663023 H  |
| atom | 1.31996179  | 3.39816516  | 8.55663050 H  |
| atom | 18.98558547 | 9.07071821  | 4.31627987 H  |
| atom | 11.47273527 | 8.93092161  | 10.75243572 H |
| atom | 8.83281215  | 3.53796206  | 2.12047474 H  |
| atom | 1.31996112  | 3.53796225  | 2.12047484 H  |
| atom | 18.98558574 | 8.93092165  | 10.75243532 H |
| atom | 13.78569790 | 3.12214797  | 2.47947462 H  |
| atom | 6.51984893  | 9.34673505  | 10.39343545 H |
| atom | 3.63292448  | 9.34673473  | 10.39343600 H |
| atom | 16.67262260 | 3.12214844  | 2.47947474 H  |
| atom | 13.78569607 | 2.98235115  | 8.91562879 H  |
| atom | 6.51985084  | 9.48653223  | 3.95728182 H  |
| atom | 3.63292355  | 9.48653207  | 3.95728170 H  |
| atom | 16.67262377 | 2.98235185  | 8.91562846 H  |
| atom | 13.78569893 | 9.49638789  | 2.47977409 H  |
| atom | 6.51984848  | 2.97249527  | 10.39313636 H |

|      |             |             |               |
|------|-------------|-------------|---------------|
| atom | 3.63292475  | 2.97249522  | 10.39313643 H |
| atom | 16.67262240 | 9.49638809  | 2.47977387 H  |
| atom | 13.78569709 | 9.35659103  | 8.91592778 H  |
| atom | 6.51985025  | 3.11229271  | 3.95698232 H  |
| atom | 3.63292325  | 3.11229223  | 3.95698269 H  |
| atom | 16.67262352 | 9.35659149  | 8.91592762 H  |
| atom | 11.52782756 | 1.58389630  | 2.52075315 C  |
| atom | 8.77771904  | 10.88498706 | 10.35215713 C |
| atom | 1.37505406  | 10.88498652 | 10.35215746 C |
| atom | 18.93049312 | 1.58389691  | 2.52075267 C  |
| atom | 11.52782696 | 1.44409859  | 8.95690924 C  |
| atom | 8.77772031  | 11.02478444 | 3.91600144 C  |
| atom | 1.37505444  | 11.02478451 | 3.91600131 C  |
| atom | 18.93049302 | 1.44409940  | 8.95690903 C  |
| atom | 11.52782809 | 7.95813692  | 2.52105256 C  |
| atom | 8.77771960  | 4.51074612  | 10.35185806 C |
| atom | 1.37505403  | 4.51074614  | 10.35185824 C |
| atom | 18.93049337 | 7.95813744  | 2.52105196 C  |
| atom | 11.52782684 | 7.81833964  | 8.95720844 C  |
| atom | 8.77772021  | 4.65054408  | 3.91570201 C  |
| atom | 1.37505316  | 4.65054370  | 3.91570224 C  |
| atom | 18.93049323 | 7.81833985  | 8.95720825 C  |
| atom | 11.76416805 | 2.79744017  | 1.60575344 C  |
| atom | 8.54137864  | 9.67144305  | 11.26715673 C |
| atom | 1.61139485  | 9.67144275  | 11.26715725 C |
| atom | 18.69415207 | 2.79744081  | 1.60575304 C  |
| atom | 11.76416627 | 2.65764180  | 8.04190843 C  |
| atom | 8.54138078  | 9.81124127  | 4.83100221 C  |
| atom | 1.61139374  | 9.81124121  | 4.83100216 C  |
| atom | 18.69415356 | 2.65764254  | 8.04190811 C  |
| atom | 11.76416935 | 9.17168060  | 1.60605248 C  |
| atom | 8.54137810  | 3.29720243  | 11.26685808 C |
| atom | 1.61139557  | 3.29720250  | 11.26685842 C |
| atom | 18.69415169 | 9.17168116  | 1.60605189 C  |
| atom | 11.76416736 | 9.03188257  | 8.04220727 C  |
| atom | 8.54137975  | 3.43700106  | 4.83070307 C  |
| atom | 1.61139373  | 3.43700069  | 4.83070339 C  |
| atom | 18.69415299 | 9.03188285  | 8.04220701 C  |
| atom | 2.58054802  | 2.89628259  | 3.75302189 C  |
| atom | 17.72499874 | 9.57260117  | 9.11988847 C  |
| atom | 12.73332188 | 9.57260068  | 9.11988865 C  |
| atom | 7.57222545  | 2.89628299  | 3.75302157 C  |
| atom | 2.58054946  | 2.75648559  | 10.18917624 C |
| atom | 17.72499766 | 9.71239778  | 2.68373412 C  |
| atom | 12.73332367 | 9.71239755  | 2.68373437 C  |
| atom | 7.57222376  | 2.75648562  | 10.18917610 C |

|      |             |             |               |
|------|-------------|-------------|---------------|
| atom | 2.58054826  | 9.27052248  | 3.75332101 C  |
| atom | 17.72499906 | 3.19836145  | 9.11958915 C  |
| atom | 12.73332078 | 3.19836072  | 9.11958950 C  |
| atom | 7.57222612  | 9.27052251  | 3.75332118 C  |
| atom | 2.58054915  | 9.13072518  | 10.18947558 C |
| atom | 17.72499794 | 3.33815805  | 2.68343496 C  |
| atom | 12.73332260 | 3.33815757  | 2.68343495 C  |
| atom | 7.57222425  | 9.13072555  | 10.18947503 C |
| atom | 1.92985851  | 0.48105686  | 0.71312176 I  |
| atom | 18.37569314 | 11.98782537 | 12.15978771 I |
| atom | 12.08262189 | 11.98782719 | 12.15978584 I |
| atom | 8.22293522  | 0.48105682  | 0.71311920 I  |
| atom | 1.92985171  | 0.34125060  | 7.14926929 I  |
| atom | 18.37570100 | 12.12763256 | 5.72364077 I  |
| atom | 12.08260921 | 12.12763353 | 5.72364010 I  |
| atom | 8.22294235  | 0.34124738  | 7.14927451 I  |
| atom | 1.92985595  | 6.85528784  | 0.71343171 I  |
| atom | 18.37569262 | 5.61359563  | 12.15947747 I |
| atom | 12.08261169 | 5.61359903  | 12.15947395 I |
| atom | 8.22293054  | 6.85528914  | 0.71342961 I  |
| atom | 1.92984441  | 6.71548120  | 7.14957990 I  |
| atom | 18.37570143 | 5.75340019  | 5.72333199 I  |
| atom | 12.08260961 | 5.75340136  | 5.72333054 I  |
| atom | 8.22293907  | 6.71548252  | 7.14958210 I  |
| atom | 15.22915502 | -0.02899504 | 2.53869568 I  |
| atom | 5.07640034  | 12.49787809 | 10.33420133 I |
| atom | 15.22915320 | -0.16880691 | 8.97487056 I  |
| atom | 5.07639686  | 12.63769378 | 3.89804511 I  |
| atom | 15.22915059 | 6.34524695  | 2.53899601 I  |
| atom | 5.07639813  | 6.12363480  | 10.33391014 I |
| atom | 15.22914940 | 6.20543209  | 8.97517609 I  |
| atom | 5.07640150  | 6.26345242  | 3.89773659 I  |
| atom | 15.22915386 | 2.72396289  | 5.77785227 I  |
| atom | 5.07639618  | 9.74492421  | 7.09505692 I  |
| atom | 15.22915287 | 2.58417219  | 12.21399949 I |
| atom | 5.07639354  | 9.88470615  | 0.65890253 I  |
| atom | 15.22915253 | 9.09820173  | 5.77815169 I  |
| atom | 5.07639690  | 3.37068269  | 7.09476315 I  |
| atom | 15.22915680 | 8.95840929  | 12.21429961 I |
| atom | 5.07639644  | 3.51047479  | 0.65861173 I  |
| atom | 12.19358024 | 2.31960066  | 3.66832440 N  |
| atom | 8.11196655  | 10.14928266 | 9.20458568 N  |
| atom | 2.04080679  | 10.14928226 | 9.20458622 N  |
| atom | 18.26474044 | 2.31960093  | 3.66832414 N  |
| atom | 12.19357935 | 2.17980417  | 10.10447985 N |
| atom | 8.11196765  | 10.28907904 | 2.76843088 N  |

|      |             |             |               |
|------|-------------|-------------|---------------|
| atom | 2.04080680  | 10.28907902 | 2.76843056 N  |
| atom | 18.26474051 | 2.17980494  | 10.10447958 N |
| atom | 12.19358104 | 8.69384081  | 3.66862402 N  |
| atom | 8.11196637  | 3.77504250  | 9.20428660 N  |
| atom | 2.04080686  | 3.77504240  | 9.20428670 N  |
| atom | 18.26474046 | 8.69384097  | 3.66862360 N  |
| atom | 12.19357992 | 8.55404441  | 10.10477924 N |
| atom | 8.11196742  | 3.91483926  | 2.76813113 N  |
| atom | 2.04080608  | 3.91483897  | 2.76813135 N  |
| atom | 18.26474056 | 8.55404488  | 10.10477908 N |
| atom | 0.42742001  | 2.66686080  | 4.98208698 O  |
| atom | 19.87812690 | 9.80202251  | 7.89082355 O  |
| atom | 10.58019388 | 9.80202281  | 7.89082399 O  |
| atom | 9.72535338  | 2.66686106  | 4.98208637 O  |
| atom | 0.42742196  | 2.52706238  | 11.41824268 O |
| atom | 19.87812520 | 9.94182144  | 1.45466763 O  |
| atom | 10.58019573 | 9.94182059  | 1.45466883 O  |
| atom | 9.72535147  | 2.52706216  | 11.41824178 O |
| atom | 0.42741917  | 9.04110268  | 4.98238508 O  |
| atom | 19.87812816 | 3.42778096  | 7.89052532 O  |
| atom | 10.58019175 | 3.42778027  | 7.89052576 O  |
| atom | 9.72535529  | 9.04110281  | 4.98238476 O  |
| atom | 0.42742027  | 8.90130433  | 11.41854066 O |
| atom | 19.87812658 | 3.56757931  | 1.45436932 O  |
| atom | 10.58019370 | 3.56757883  | 1.45437058 O  |
| atom | 9.72535310  | 8.90130451  | 11.41853983 O |

#### 4. DFT- relaxed (AzF<sub>2</sub>)<sub>2</sub>PbI<sub>4</sub>

|                |             |             |                |
|----------------|-------------|-------------|----------------|
| lattice_vector | 25.35249225 | 0.00000000  | 0.00000000     |
| lattice_vector | -0.00000286 | 8.78899687  | 0.00000000     |
| lattice_vector | -9.27002820 | -0.00000371 | 24.21244893    |
| atom           | 12.47199331 | 6.72102831  | 12.47422724 Pb |
| atom           | 17.10692204 | 2.06799556  | 0.36804780 Pb  |
| atom           | 10.75251276 | 2.25075497  | 16.60031363 Pb |
| atom           | 15.38743919 | 6.53825697  | 4.49413104 Pb  |
| atom           | 13.77007015 | 2.25568192  | 8.63185666 Pb  |
| atom           | 9.13506263  | 6.53333374  | 20.73810973 Pb |
| atom           | 16.68641670 | 2.73327424  | 9.93455852 I   |
| atom           | 12.05140516 | 6.05573080  | 22.04080141 I  |
| atom           | 11.78056659 | 8.31576491  | 15.21567547 I  |
| atom           | 16.41552066 | 0.47322139  | 3.10945981 I   |
| atom           | 9.72658075  | 0.39586659  | 18.99437372 I  |
| atom           | 14.36153876 | 8.39313470  | 6.88817509 I   |
| atom           | 13.08746461 | 0.91082826  | 11.42194296 I  |
| atom           | 8.45244583  | 7.87820470  | 23.52816020 I  |
| atom           | 13.14958766 | 5.22272022  | 9.73150592 I   |

|      |             |            |                |
|------|-------------|------------|----------------|
| atom | 8.51455977  | 3.56631322 | 21.83778603 I  |
| atom | 14.32327562 | 3.80719430 | 5.84445845 I   |
| atom | 9.68832192  | 4.98177624 | 17.95071029 I  |
| atom | 9.60767323  | 7.09665524 | 11.21163029 I  |
| atom | 4.97262813  | 1.69232846 | 23.31783900 I  |
| atom | 11.81280557 | 4.11475799 | 14.22400960 I  |
| atom | 16.44774836 | 4.67425476 | 2.11782205 I   |
| atom | 13.41847275 | 2.69770904 | 18.29367758 I  |
| atom | 18.05341827 | 6.09127586 | 6.18744525 I   |
| atom | 8.03790377  | 1.83918702 | 14.89005249 I  |
| atom | 12.67285715 | 6.94979571 | 2.78381641 I   |
| atom | 10.68651560 | 1.66997514 | 7.77808496 I   |
| atom | 6.05152719  | 7.11903767 | 19.88430111 I  |
| atom | 15.61746621 | 6.22121528 | 13.29913856 I  |
| atom | 20.25241399 | 2.56777333 | 1.19294275 I   |
| atom | 1.24385795  | 2.12861787 | 8.79935946 Pb  |
| atom | -3.39105568 | 6.66035553 | 20.90560441 Pb |
| atom | -0.35982843 | 6.61621657 | 13.00645149 Pb |
| atom | 4.27511363  | 2.17279395 | 0.90018948 Pb  |
| atom | -2.00254675 | 2.35694867 | 16.66440406 Pb |
| atom | 2.63239742  | 6.43208415 | 4.55822650 Pb  |
| atom | 1.30381930  | 4.86012667 | 7.08818549 I   |
| atom | -3.33114771 | 3.92886238 | 19.19441182 I  |
| atom | -3.47699451 | 7.01094129 | 11.95505351 I  |
| atom | -8.11206670 | 1.77807939 | 24.06125552 I  |
| atom | -1.71178450 | 5.32216000 | 15.53205336 I  |
| atom | 2.92320927  | 3.46685660 | 3.42580288 I   |
| atom | 0.99743000  | 8.17850579 | 10.49500135 I  |
| atom | -3.63758455 | 0.61048478 | 22.60123383 I  |
| atom | 1.14963296  | 2.70945340 | 17.43316785 I  |
| atom | 5.78457761  | 6.07955940 | 5.32694466 I   |
| atom | 1.92488726  | 0.28247028 | 6.28890077 I   |
| atom | -2.71003376 | 8.50653852 | 18.39512605 I  |
| atom | -0.94839194 | 0.76370432 | 14.15558457 I  |
| atom | 3.68655331  | 8.02531663 | 2.04937645 I   |
| atom | 0.57157213  | 3.89466347 | 11.41036221 I  |
| atom | -4.06344292 | 4.89433151 | 23.51656804 I  |
| atom | -1.86980493 | 1.79654762 | 8.27415097 I   |
| atom | -6.50473507 | 6.99243677 | 20.38034478 I  |
| atom | 4.40372299  | 2.63555968 | 9.30546811 I   |
| atom | -0.23120364 | 6.15340001 | 21.41168011 I  |
| atom | -4.90604086 | 1.98321831 | 15.28554911 I  |
| atom | -0.27108296 | 6.80574752 | 3.17931004 I   |
| atom | 2.46626403  | 6.25801401 | 14.42685921 I  |
| atom | 7.10122116  | 2.53096696 | 2.32061479 I   |
| atom | 18.28500445 | 8.32032220 | 11.53432728 F  |

|      |             |            |               |
|------|-------------|------------|---------------|
| atom | 13.64997259 | 0.46868303 | 23.64057139 F |
| atom | 16.85840172 | 6.24796515 | 9.49492565 N  |
| atom | 12.22338279 | 2.54103893 | 21.60115249 N |
| atom | 16.18402736 | 5.57368049 | 9.89912370 H  |
| atom | 11.54900757 | 3.21533075 | 22.00533819 H |
| atom | 16.94507602 | 6.06811771 | 8.46644418 H  |
| atom | 12.31006754 | 2.72087719 | 20.57267098 H |
| atom | 18.91369194 | 8.48790492 | 9.43438017 F  |
| atom | 14.27866415 | 0.30109861 | 21.54062555 F |
| atom | 16.63815275 | 7.71888404 | 9.80812793 C  |
| atom | 12.00312584 | 1.07012317 | 21.91436669 C |
| atom | 15.89863822 | 7.83748522 | 10.60564349 H |
| atom | 11.26360876 | 0.95153344 | 22.71188184 H |
| atom | 16.37380425 | 8.29620419 | 8.91860086 H  |
| atom | 11.73877720 | 0.49279634 | 21.02484405 H |
| atom | 18.09404622 | 7.80295247 | 10.28535338 C |
| atom | 13.45901735 | 0.98605216 | 22.39159685 C |
| atom | 18.22221449 | 6.27550829 | 10.16411784 C |
| atom | 13.58718952 | 2.51349602 | 22.27035803 C |
| atom | 19.02077124 | 5.89987782 | 9.52055909 H  |
| atom | 14.38575354 | 2.88912363 | 21.62680659 H |
| atom | 18.18698889 | 5.74818186 | 11.11992379 H |
| atom | 13.55195530 | 3.04082699 | 23.22616126 H |
| atom | 3.33809724  | 8.30548812 | 17.48643270 F |
| atom | 7.97304295  | 0.48352305 | 5.38020265 F  |
| atom | 2.48597940  | 8.43608611 | 19.50531624 F |
| atom | 7.12093283  | 0.35292092 | 7.39908872 F  |
| atom | 2.39800642  | 7.77463554 | 18.30559476 C |
| atom | 7.03295559  | 1.01437442 | 6.19936928 C  |
| atom | 2.41092568  | 6.24159562 | 18.44562263 C |
| atom | 7.04587757  | 2.54741385 | 6.33940162 C  |
| atom | 2.98936307  | 5.73674873 | 17.66789652 H |
| atom | 7.62431026  | 3.05226183 | 5.56167266 H  |
| atom | 2.61457296  | 5.83976288 | 19.44088332 H |
| atom | 7.24953259  | 2.94924381 | 7.33466194 H  |
| atom | 0.96653990  | 7.70833821 | 17.75088715 C |
| atom | 5.60148665  | 1.08067604 | 5.64466753 C  |
| atom | 0.19790355  | 8.27717911 | 18.28030975 H |
| atom | 4.83285136  | 0.51183352 | 6.17409016 H  |
| atom | 0.90178922  | 7.84761571 | 16.66794619 H |
| atom | 5.53673134  | 0.94140445 | 4.56172609 H  |
| atom | 0.93237497  | 6.22907701 | 18.09744943 N |
| atom | 5.56732470  | 2.55993542 | 5.99123802 N  |
| atom | 0.34665983  | 6.03734135 | 18.94506445 H |
| atom | 4.98161511  | 2.75166438 | 6.83885917 H  |
| atom | 0.66121459  | 5.58130167 | 17.33532811 H |

|      |             |            |               |
|------|-------------|------------|---------------|
| atom | 5.29615904  | 3.20771581 | 5.22912265 H  |
| atom | 7.27696754  | 4.01237430 | 11.51493269 F |
| atom | 2.64196226  | 4.77660305 | 23.62112278 F |
| atom | 8.01941766  | 3.78379386 | 9.45855683 F  |
| atom | 3.38443455  | 5.00518972 | 21.56475514 F |
| atom | 9.36493225  | 1.79837454 | 11.62635670 N |
| atom | 4.72992410  | 6.99060497 | 23.73257368 N |
| atom | 9.23294031  | 1.65075829 | 12.65477947 H |
| atom | 13.86795237 | 7.13822531 | 0.54854530 H  |
| atom | 10.06697122 | 1.12208029 | 11.27421571 H |
| atom | 5.43196655  | 7.66689839 | 23.38043780 H |
| atom | 8.14852013  | 3.31106042 | 10.73033627 C |
| atom | 3.51352155  | 5.47791998 | 22.83653814 C |
| atom | 8.03421814  | 1.78504121 | 10.89278248 C |
| atom | 3.39921619  | 7.00393870 | 22.99898711 C |
| atom | 8.11985653  | 1.23188280 | 9.95379198 H  |
| atom | 3.48486176  | 7.55710061 | 22.05999935 H |
| atom | 7.21243853  | 1.41682196 | 11.51193763 H |
| atom | 2.57743115  | 7.37215535 | 23.61813651 H |
| atom | 9.58002560  | 3.26292390 | 11.28227528 C |
| atom | 4.94502066  | 5.52605572 | 23.38849185 C |
| atom | 10.35719332 | 3.37099243 | 10.51982490 H |
| atom | 5.72219787  | 5.41798700 | 22.62605111 H |
| atom | 9.79288159  | 3.87154876 | 12.16496345 H |
| atom | 14.42789361 | 4.91743382 | 0.05873307 H  |
| atom | 20.57155124 | 3.96309348 | 10.06489809 F |
| atom | 15.93653766 | 4.82592886 | 22.17108831 F |
| atom | 19.71906782 | 3.86802667 | 12.08800225 F |
| atom | 15.08406922 | 4.92100882 | 24.19419778 F |
| atom | -3.16620298 | 1.84478711 | 11.52713364 N |
| atom | -7.80117797 | 6.94421504 | 23.63330939 N |
| atom | -2.57277986 | 1.65235932 | 10.68475960 H |
| atom | -7.20775549 | 7.13663342 | 22.79093248 H |
| atom | -2.85499319 | 1.23610322 | 12.31006451 H |
| atom | 1.78007478  | 7.55289531 | 0.20379252 H  |
| atom | -3.24000247 | 3.33096217 | 11.83661420 C |
| atom | -7.87499626 | 5.45804145 | 23.94279243 C |
| atom | -2.49170446 | 3.90821285 | 11.28964917 H |
| atom | -7.12671137 | 4.88078001 | 23.39582103 H |
| atom | -3.17843841 | 3.50576953 | 12.91484287 H |
| atom | 1.45660346  | 5.28323761 | 0.80857177 H  |
| atom | 20.68069205 | 3.34335487 | 11.27586439 C |
| atom | 16.04569365 | 5.44566748 | 23.38205347 C |
| atom | 20.70951681 | 1.80835777 | 11.18108376 C |
| atom | 16.07453924 | 6.98066439 | 23.28727033 C |
| atom | 20.51314392 | 1.37431346 | 10.19847361 H |

|      |             |            |               |
|------|-------------|------------|---------------|
| atom | 15.87816522 | 7.41471035 | 22.30466110 H |
| atom | 20.14437301 | 1.30580546 | 11.96901978 H |
| atom | 15.50940701 | 7.48322501 | 24.07520953 H |
| atom | 3.60506689  | 5.97255847 | 9.89818844 N  |
| atom | -1.02995351 | 2.81641333 | 22.00440286 N |
| atom | 2.65397528  | 6.31287521 | 10.15941338 H |
| atom | -1.98104525 | 2.47609183 | 22.26562410 H |
| atom | 3.58406375  | 4.96007156 | 9.62524529 H  |
| atom | -1.05095831 | 3.82889726 | 21.73145712 H |
| atom | 5.88223642  | 8.24800941 | 10.12491624 F |
| atom | 1.24723120  | 0.54097745 | 22.23114181 F |
| atom | 6.58934875  | 6.30530194 | 9.39725366 F  |
| atom | 1.95432933  | 2.48369057 | 21.50347790 F |
| atom | 4.68633234  | 6.25834323 | 10.92176624 C |
| atom | 0.05130799  | 2.53063447 | 23.02798639 C |
| atom | 5.13782767  | 5.34640097 | 11.31979720 H |
| atom | 0.50279346  | 3.44257935 | 23.42602197 H |
| atom | 4.31034610  | 6.90798990 | 11.71725039 H |
| atom | -0.32467997 | 1.88098415 | 23.82346669 H |
| atom | 5.48785352  | 6.98527586 | 9.82556130 C  |
| atom | 0.85283979  | 1.80370805 | 21.93178472 C |
| atom | 4.28999591  | 6.85019280 | 8.87072375 C  |
| atom | -0.34501551 | 1.93878027 | 20.97694318 C |
| atom | 3.72466713  | 7.77547099 | 8.71669753 H  |
| atom | -0.91033867 | 1.01349862 | 20.82291774 H |
| atom | 4.48580561  | 6.33427861 | 7.92518604 H  |
| atom | -0.14920681 | 2.45469288 | 20.03140459 H |
| atom | 15.41031839 | 2.74125185 | 13.39707911 N |
| atom | 20.04526917 | 6.04774210 | 1.29087254 N  |
| atom | 15.29668673 | 3.78622876 | 13.31258370 H |
| atom | 19.93164266 | 5.00276570 | 1.20636710 H  |
| atom | 15.00916494 | 2.28986574 | 12.54841702 H |
| atom | 19.64410767 | 6.49913805 | 0.44221875 H  |
| atom | 16.77213773 | 2.63663274 | 16.16833713 F |
| atom | 21.40710183 | 6.15234255 | 4.06212717 F  |
| atom | 16.34480847 | 1.87523971 | 15.11979125 C |
| atom | 20.97976037 | 6.91374165 | 3.01359095 C  |
| atom | 14.89842897 | 2.16474194 | 14.70296253 C |
| atom | 19.53338153 | 6.62423319 | 2.59676518 C  |
| atom | 14.27526049 | 1.27966708 | 14.53309243 H |
| atom | 18.91020536 | 7.50930520 | 2.42690844 H  |
| atom | 14.36652816 | 2.90314497 | 15.30746134 H |
| atom | 19.00148879 | 5.88581967 | 3.20125811 H  |
| atom | 16.62559001 | 0.57802039 | 15.42482933 F |
| atom | 21.26053382 | 8.21096097 | 3.31864141 F  |
| atom | 16.83686766 | 2.35097739 | 13.73849876 C |

|      |             |            |               |
|------|-------------|------------|---------------|
| atom | 21.47181731 | 6.43802249 | 1.63229102 C  |
| atom | 17.19883460 | 1.55636476 | 13.08068538 H |
| atom | 21.83377623 | 7.23264418 | 0.97448411 H  |
| atom | 17.51214571 | 3.21037476 | 13.73709006 H |
| atom | 22.14710200 | 5.57863022 | 1.63086996 H  |
| atom | 2.46356773  | 2.59718167 | 14.10929631 N |
| atom | 7.09851064  | 6.19180333 | 2.00308944 N  |
| atom | 2.09252534  | 2.75223016 | 15.07768718 H |
| atom | 6.72746901  | 6.03675263 | 2.97148026 H  |
| atom | 1.88678986  | 3.14823301 | 13.43469447 H |
| atom | 6.52173990  | 5.64074678 | 1.32848549 H  |
| atom | 4.72252248  | 0.62571684 | 14.78297466 F |
| atom | 9.35746010  | 8.16328816 | 2.67674571 F  |
| atom | 4.11809812  | 1.28020821 | 13.75232746 C |
| atom | 8.75303018  | 7.50878688 | 1.64610825 C  |
| atom | 4.75663973  | 0.91264837 | 12.60773132 F |
| atom | 9.39155976  | 7.87634135 | 0.50150358 F  |
| atom | 2.59398396  | 1.12891038 | 13.74824851 C |
| atom | 7.22891522  | 7.66007461 | 1.64203891 C  |
| atom | 2.15646565  | 0.91657989 | 12.76673684 H |
| atom | 6.79138960  | 7.87240146 | 0.66052977 H  |
| atom | 2.18601951  | 0.46575076 | 14.51300040 H |
| atom | 6.82095046  | 8.32323168 | 2.40679263 H  |
| atom | 3.96248584  | 2.79840637 | 13.97011611 C |
| atom | 8.59742962  | 5.99058906 | 1.86390832 C  |
| atom | 4.19122876  | 3.39768020 | 13.08508670 H |
| atom | 8.82617580  | 5.39130806 | 0.97888459 H  |
| atom | 4.42236348  | 3.21449076 | 14.86768878 H |
| atom | 9.05731060  | 5.57451615 | 2.76148456 H  |
| atom | 17.98966727 | 2.71834457 | 5.25928897 N  |
| atom | 13.35466982 | 6.07063794 | 17.36552730 N |
| atom | 17.42897356 | 2.39074073 | 4.44369627 H  |
| atom | 12.79396164 | 6.39823728 | 16.54994294 H |
| atom | 17.72380627 | 3.69724759 | 5.52111636 H  |
| atom | 13.08882064 | 5.09173295 | 17.62736069 H |
| atom | 17.96650995 | 1.74319355 | 6.42064819 C  |
| atom | 13.33152781 | 7.04578962 | 18.52688610 C |
| atom | 17.49103295 | 0.80330275 | 6.12098986 H  |
| atom | 12.85603440 | 7.98567551 | 18.22723867 H |
| atom | 17.50925859 | 2.16180749 | 7.32520005 H  |
| atom | 12.87429959 | 6.62717149 | 19.43144803 H |
| atom | 20.07508620 | 0.48440429 | 6.27922610 F  |
| atom | 15.44008950 | 8.30459830 | 18.38541264 F |
| atom | 19.49140223 | 2.56176124 | 5.10655633 C  |
| atom | 14.85640012 | 6.22723089 | 17.21276511 C |
| atom | 19.73791328 | 2.01539380 | 4.19068293 H  |

|      |             |            |               |
|------|-------------|------------|---------------|
| atom | 15.10289049 | 6.77359665 | 16.29688517 H |
| atom | 20.01677683 | 3.52018896 | 5.15652120 H  |
| atom | 15.38178199 | 5.26880677 | 17.26272438 H |
| atom | 19.50395220 | 1.71246187 | 6.39184310 C  |
| atom | 14.86896944 | 7.07653578 | 18.49804806 C |
| atom | 20.07587980 | 2.33392130 | 7.46172260 F  |
| atom | 15.44092633 | 6.45508772 | 19.56791845 F |
| atom | 18.69364351 | 6.33774486 | 15.96705049 C |
| atom | 23.32861224 | 2.45123235 | 3.86080701 C  |
| atom | -4.86910035 | 7.25486583 | 15.23025997 N |
| atom | -0.23414756 | 1.53411316 | 3.12397756 N  |
| atom | -4.08991706 | 6.90481595 | 14.63484789 H |
| atom | 0.54499748  | 1.88413074 | 2.52849320 H  |
| atom | -4.69887224 | 8.27555537 | 15.41796781 H |
| atom | -0.06389718 | 0.51343863 | 3.31174150 H  |
| atom | 17.81410139 | 7.07233112 | 16.71324921 F |
| atom | 22.44913648 | 1.71664977 | 4.60708932 F  |
| atom | 18.18328317 | 5.08382944 | 15.86547713 F |
| atom | 22.81820063 | 3.70512357 | 3.75920084 F  |
| atom | 19.10282618 | 7.01390228 | 14.64517664 C |
| atom | 23.73774590 | 1.77501777 | 2.53894762 C  |
| atom | 18.58445568 | 7.94192453 | 14.39421644 H |
| atom | 23.21938155 | 0.84697329 | 2.28805708 H  |
| atom | 19.15964500 | 6.33927803 | 13.78709415 H |
| atom | 23.79451034 | 2.44960330 | 1.68083129 H  |
| atom | -5.20838840 | 6.42922499 | 16.45906379 C |
| atom | -0.57338885 | 2.35983005 | 4.35274432 C  |
| atom | -5.03480806 | 6.97035782 | 17.39298566 H |
| atom | -0.39973071 | 1.81876988 | 5.28669403 H  |
| atom | -4.66747122 | 5.47796694 | 16.44899224 H |
| atom | -0.03250612 | 3.31110631 | 4.34256789 H  |
| atom | 6.14531990  | 1.84868546 | 19.83428583 N |
| atom | 10.78028094 | 6.94032313 | 7.72805745 N  |
| atom | 6.63609794  | 2.25857489 | 20.65845410 H |
| atom | 11.27105792 | 6.53044472 | 8.55223032 H  |
| atom | 6.17314068  | 0.79759913 | 19.91207273 H |
| atom | 10.80810343 | 7.99141099 | 7.80583363 H  |
| atom | 6.65062128  | 2.37785843 | 18.50693057 C |
| atom | 11.28557826 | 6.41113456 | 6.40070693 C  |
| atom | 7.06588480  | 1.59281589 | 17.87111187 H |
| atom | 11.70085167 | 7.19616672 | 5.76488196 H  |
| atom | 7.37369809  | 3.18974354 | 18.64700723 H |
| atom | 12.00864428 | 5.59924126 | 6.54079186 H  |
| atom | 5.22610118  | 2.82747106 | 18.16550796 C |
| atom | 9.86105337  | 5.96153440 | 6.05928718 C  |
| atom | 4.66462651  | 2.12892827 | 17.13996932 F |

|      |             |            |               |
|------|-------------|------------|---------------|
| atom | 9.29958416  | 6.66008633 | 5.03375176 F  |
| atom | 5.07549312  | 4.15323217 | 17.86930620 F |
| atom | 9.71043305  | 4.63577588 | 5.76308218 F  |
| atom | 4.75449724  | 2.39993056 | 19.56800073 C |
| atom | 9.38945660  | 6.38907790 | 7.46178136 C  |
| atom | 3.98333731  | 1.62676917 | 19.60196881 H |
| atom | 8.61829653  | 7.16223893 | 7.49575318 H  |
| atom | 4.52043295  | 3.22744264 | 20.24271716 H |
| atom | 9.15539784  | 5.56156623 | 8.13650030 H  |
| atom | -1.27319666 | 7.18927904 | 7.60604109 N  |
| atom | -5.90815719 | 1.59971306 | 19.71223199 N |
| atom | -0.32126204 | 6.86944459 | 7.33198387 H  |
| atom | -4.95623131 | 1.91956498 | 19.43816384 H |
| atom | -1.23258455 | 8.16351550 | 7.98811403 H  |
| atom | -5.86752533 | 0.62547166 | 20.09429122 H |
| atom | 21.06790519 | 6.79467089 | 7.97060813 F  |
| atom | 16.43294735 | 1.99427021 | 20.07686460 F |
| atom | -1.99361884 | 6.20233031 | 8.50373132 C  |
| atom | -6.62857520 | 2.58663890 | 20.60995022 C |
| atom | -2.22129839 | 6.60861093 | 9.49602283 H  |
| atom | -6.85622875 | 2.18034125 | 21.60223983 H |
| atom | -1.43386491 | 5.26256219 | 8.56264480 H  |
| atom | -6.06883350 | 3.52641438 | 20.66886538 H |
| atom | 21.82668945 | 4.95982351 | 7.03305281 F  |
| atom | 17.19168390 | 3.82914428 | 19.13932272 F |
| atom | -2.33451807 | 7.04648691 | 6.53064505 C  |
| atom | -6.96950098 | 1.74250727 | 18.63685826 C |
| atom | 22.58104644 | 8.00896058 | 6.24874775 H  |
| atom | 17.94607278 | 0.78003161 | 18.35495348 H |
| atom | -1.93948340 | 6.51359287 | 5.65990849 H  |
| atom | -6.57449118 | 2.27542196 | 17.76612355 H |
| atom | 22.19212641 | 6.18116790 | 7.50042336 C  |
| atom | 17.55714856 | 2.60779825 | 19.60666640 C |
| atom | 7.98398952  | 7.27764693 | 15.95906040 N |
| atom | 12.61893705 | 1.51132908 | 3.85281886 N  |
| atom | 8.14659069  | 8.30458900 | 15.82083922 H |
| atom | 12.78152356 | 0.48438339 | 3.71460073 H  |
| atom | 8.50773566  | 6.92230010 | 16.78761300 H |
| atom | 13.14268726 | 1.86667225 | 4.68137000 H  |
| atom | 8.25377640  | 6.48672190 | 14.69381749 C |
| atom | 12.88873666 | 2.30224194 | 2.58757111 C  |
| atom | 8.78450984  | 5.55796865 | 14.93053530 H |
| atom | 13.41948169 | 3.23099024 | 2.82428192 H  |
| atom | 8.77563712  | 7.06195913 | 13.92252731 H |
| atom | 13.41059064 | 1.72699220 | 1.81628564 H  |
| atom | 6.28986142  | 5.04681724 | 14.32440840 F |

|      |             |            |             |   |
|------|-------------|------------|-------------|---|
| atom | 10.92483834 | 3.74216515 | 2.21813970  | F |
| atom | 6.51125338  | 6.90900461 | 15.91530257 | C |
| atom | 11.14620681 | 1.87999410 | 3.80905814  | C |
| atom | 6.28528942  | 6.15956331 | 16.67957471 | H |
| atom | 10.92025656 | 2.62944824 | 4.57332177  | H |
| atom | 5.84763182  | 7.77283682 | 15.98840530 | H |
| atom | 10.48257063 | 1.01617409 | 3.88217120  | H |
| atom | 6.73814962  | 6.31736104 | 14.51158879 | C |
| atom | 11.37311219 | 2.47161931 | 2.40533802  | C |
| atom | 6.22877315  | 7.07685825 | 13.49797649 | F |
| atom | 10.86373160 | 1.71211382 | 1.39173384  | F |

**5. Pb and I atom indices of (AzF<sub>2</sub>)<sub>2</sub>PbI<sub>4</sub> (as used in Tables S2, S3 and S5 and derived from the reported CIF)**

|             |             |             |      |
|-------------|-------------|-------------|------|
| 12.82449539 | 6.731304768 | 12.634585   | Pb1  |
| 17.3088423  | 2.081495232 | 0.467460908 | Pb2  |
| 11.14836076 | 2.229726528 | 16.72590215 | Pb3  |
| 15.63270767 | 6.583073472 | 4.558778054 | Pb4  |
| 14.04651555 | 2.305604736 | 8.684649833 | Pb5  |
| 9.562168644 | 6.507195264 | 20.85177392 | Pb6  |
| 16.98433156 | 2.717603136 | 9.900875558 | I7   |
| 12.49998465 | 6.095196864 | 22.06799965 | I8   |
| 12.1860411  | 8.345545344 | 15.32838627 | I9   |
| 16.67038801 | 0.467254656 | 3.161262181 | I10  |
| 10.02577793 | 0.3503088   | 19.0707503  | I11  |
| 14.51012484 | 8.4624912   | 6.903626209 | I12  |
| 13.39367911 | 0.809279424 | 11.39524174 | I13  |
| 8.9093322   | 8.003520576 | 23.56236583 | I14  |
| 13.44721462 | 5.166327744 | 9.942487122 | I15  |
| 8.962867711 | 3.646472256 | 22.10961121 | I16  |
| 14.61345164 | 3.883095936 | 5.952157105 | I17  |
| 10.12910473 | 4.929704064 | 18.1192812  | I18  |
| 9.911931842 | 7.099062912 | 11.49087533 | I19  |
| 5.427584933 | 1.713737088 | 23.65799942 | I20  |
| 12.29238448 | 4.104473472 | 14.39443783 | I21  |
| 16.77673138 | 4.708326528 | 2.227313736 | I22  |
| 13.78776468 | 2.617577856 | 18.42248593 | I23  |
| 18.27211159 | 6.195222144 | 6.255361838 | I24  |
| 8.471319466 | 1.84363776  | 15.01958466 | I25  |
| 12.95566638 | 6.96916224  | 2.852460572 | I26  |
| 10.9434599  | 1.85333184  | 7.909117344 | I27  |
| 6.459112991 | 6.95946816  | 20.07624143 | I28  |
| 15.98357883 | 6.28044192  | 13.30742696 | I29  |
| 20.46792574 | 2.53235808  | 1.14030287  | I30  |
| 1.352356999 | 2.204610048 | 8.735995097 | Pb31 |

|              |             |             |      |
|--------------|-------------|-------------|------|
| -3.13198991  | 6.608189952 | 20.90311919 | Pb32 |
| -0.181985189 | 6.717644928 | 12.91223877 | Pb33 |
| 4.30236172   | 2.095155072 | 0.745114679 | Pb34 |
| -1.759219249 | 2.302344    | 16.6838039  | Pb35 |
| 2.72512766   | 6.510456    | 4.516679805 | Pb36 |
| 1.476742194  | 4.900004928 | 7.009723531 | I37  |
| -3.007604715 | 3.912795072 | 19.17684762 | I38  |
| -3.229951402 | 7.112899008 | 11.9094244  | I39  |
| -7.714298311 | 1.699900992 | 24.07654849 | I40  |
| -1.444049147 | 5.191972992 | 15.3777848  | I41  |
| 3.040297763  | 3.620827008 | 3.210660705 | I42  |
| 1.152462945  | 8.311968576 | 10.45593976 | I43  |
| -3.331883964 | 0.500831424 | 22.62306385 | I44  |
| 1.271630828  | 2.651242752 | 17.63648971 | I45  |
| 5.755977737  | 6.161557248 | 5.469365621 | I46  |
| 1.990840584  | 0.333652608 | 6.213020246 | I47  |
| -2.493506325 | 8.479147392 | 18.38014434 | I48  |
| -0.549269397 | 0.783105408 | 14.19708707 | I49  |
| 3.935077512  | 8.029694592 | 2.029962983 | I50  |
| 0.679129323  | 4.069927296 | 11.24972293 | I51  |
| -3.805217586 | 4.742872704 | 23.41684702 | I52  |
| -1.736551615 | 1.843461504 | 8.282648054 | I53  |
| -6.220898524 | 6.969338496 | 20.44977214 | I54  |
| 4.527289795  | 2.643046848 | 9.180338469 | I55  |
| 0.042942886  | 6.169753152 | 21.34746256 | I56  |
| -4.598930747 | 1.879593984 | 15.20209152 | I57  |
| -0.114583838 | 6.933206016 | 3.034967433 | I58  |
| 2.617429751  | 6.323800896 | 14.37059026 | I59  |
| 7.10177666   | 2.488999104 | 2.203466173 | I60  |

### Supplementary References

- 1 Malinowski, A. *et al.* Spin relaxation in GaAs/Al<sub>x</sub>Ga<sub>1-x</sub>As quantum wells. *Phys. Rev. B* **62**, 13034-13039 (2000). <https://doi.org/10.1103/PhysRevB.62.13034>
- 2 Huang, Y. *et al.* Room-temperature electron spin polarization exceeding 90% in an opto-spintronic semiconductor nanostructure via remote spin filtering. *Nat. Photon.* **15**, 475-482 (2021). <https://doi.org/10.1038/s41566-021-00786-y>
- 3 Buß, J. H. *et al.* Long room-temperature electron spin lifetimes in highly doped cubic GaN. *Appl. Phys. Lett.* **97**, 062101 (2010). <https://doi.org/10.1063/1.3478838>

- 4 Litvinenko, K. L. *et al.* Spin lifetime in high quality InSb epitaxial layers grown on GaAs. *J. Appl. Phys.* **101**, 083105 (2007). <https://doi.org/10.1063/1.2719017>
- 5 Xu, J. *et al.* How spin relaxes and dephases in bulk halide perovskites. *Nat. Commun.* **15**, 188 (2024). <https://doi.org/10.1038/s41467-023-42835-w>
- 6 Zhou, M., Sarmiento, J. S., Fei, C., Zhang, X. & Wang, H. Effect of composition on the spin relaxation of lead halide perovskites. *J. Phys. Chem. Lett.* **11**, 1502-1507 (2020). <https://doi.org/10.1021/acs.jpcclett.0c00004>
- 7 Dataset: mp-20459, Materials data on  $\text{TiPbO}_3$  by Materials Project. <https://doi.org/10.17188/1195590>
- 8 Chakraborty, R., Sercel, P. C., Qin, X., Mitzi, D. B. & Blum, V. Design of two-dimensional hybrid perovskites with giant spin splitting and persistent spin textures. *J. Am. Chem. Soc.* **146**, 34811-34821 (2024). <https://doi.org/10.1021/jacs.4c13597>
- 9 Mercier, N., Poiroux, S., Riou, A. & Batail, P. Unique hydrogen bonding correlating with a reduced band gap and phase transition in the hybrid perovskites  $(\text{HO}(\text{CH}_2)_2\text{NH}_3)_2\text{PbX}_4$  ( $\text{X} = \text{I}, \text{Br}$ ). *Inorg. Chem.* **43**, 8361-8366 (2004). <https://doi.org/10.1021/ic048814u>
- 10 Chakraborty, R., Sheikh, T. & Nag, A. Iodine–Iodine Interactions Suppressing phase transitions of 2D layered hybrid  $(\text{I}(\text{CH}_2)_n\text{NH}_3)_2\text{PbI}_4$  ( $n = 2\text{--}6$ ) perovskites. *Chem. Mater.* **34**, 288-296 (2021). <https://doi.org/10.1021/acs.chemmater.1c03492>
- 11 Jana, M. K. *et al.* Organic-to-inorganic structural chirality transfer in a 2D hybrid perovskite and impact on Rashba-Dresselhaus spin-orbit coupling. *Nat. Commun.* **11**, 4699 (2020). <https://doi.org/10.1038/s41467-020-18485-7>
- 12 Jana, M. K., Xie, Y. & Mitzi, D. B. Impact of structural distortions on the optoelectronic and spin-related properties of two-dimensional hybrid perovskites in *Hybrid Organic Inorganic Perovskites*. World Scientific 1-61 (2022). [https://doi.org/10.1142/9789811242014\\_0001](https://doi.org/10.1142/9789811242014_0001)
- 13 Robinson, K., Gibbs, G. V. & Ribbe, P. H. Quadratic elongation: A quantitative measure of distortion in coordination polyhedra. *Science* **172**, 567-570 (1971). <https://doi.org/doi:10.1126/science.172.3983.567>
